## RESEARCH ARTICLE

# β-glucan administration improves growth performance and gut health in New Zealand White and APRI rabbits with different breed responses

Mahmoud M. Abo Ghanima<sup>1</sup>, Ayman H. Abd El-Aziz<sup>1</sup>, Ahmed E. Noreldin<sup>2</sup>, Mustafa S. Atta<sup>3</sup>, Shaker A. Mousa<sup>4</sup>, Ali H. El-Far<sup>5\*</sup>

**1** Department of Animal Husbandry and Animal Wealth Development, Faculty of Veterinary Medicine, Damanhour University, Damanhour, Egypt, **2** Department of Histology and Cytology, Faculty of Veterinary Medicine, Damanhour University, Damanhour, Egypt, **3** Department of Physiology, Faculty of Veterinary Medicine, Kafrelsheikh University, Kafrelsheikh, Egypt, **4** Pharmaceutical Research Institute, Albany College of Pharmacy and Health Sciences, Rensselaer, NY, United States of America, **5** Department of Biochemistry, Faculty of Veterinary Medicine, Damanhour University, Damanhour, Egypt

\* [ali.elfar@damanhour.edu.eg](mailto:ali.elfar@damanhour.edu.eg)

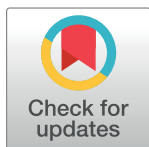

## OPEN ACCESS

**Citation:** Abo Ghanima MM, Abd El-Aziz AH, Noreldin AE, Atta MS, Mousa SA, El-Far AH (2020) β-glucan administration improves growth performance and gut health in New Zealand White and APRI rabbits with different breed responses. PLoS ONE 15(6): e0234076. <https://doi.org/10.1371/journal.pone.0234076>

**Editor:** Cristina Óvilo, INIA, SPAIN

**Received:** October 6, 2019

**Accepted:** May 18, 2020

**Published:** June 10, 2020

**Copyright:** © 2020 Abo Ghanima et al. This is an open access article distributed under the terms of the [Creative Commons Attribution License](https://creativecommons.org/licenses/by/4.0/), which permits unrestricted use, distribution, and reproduction in any medium, provided the original author and source are credited.

**Data Availability Statement:** All relevant data are within the manuscript and its Supporting Information files.

**Funding:** The authors received no specific funding for this work.

**Competing interests:** The authors have declared that no competing interests exist.

## Abstract

This study investigated the effects of oral administration of β-glucan 1,3 (pharmaceutical grade 10%) on growth performance and carcass traits in two breeds of weanling rabbits adapted to survive in Egypt, New Zealand White (NZW) and Animal Production Research Institute (APRI) rabbits, with special attention to relative mRNA expression of interleukins and antioxidant enzyme genes, biochemical, and histological alterations. Oral administration of β-glucan with doses 0.25 and 0.5 ml per one-liter of drinking water significantly accelerated body weight gain (BWG) in both rabbits' breeds, reduced total feed consumption (FC), and reduced feed conversion ratio (FCR), especially the 0.5 ml per one-liter dose in both rabbit breeds. There are remarkable differences in all the growth performance traits due to breed effect. The interaction effect between β-glucan and breed significantly improved BWG, FC, and FCR. There were non-significant differences in all carcass traits studied due to oral administration of β-glucan with both doses, except in dressing percentages. The highest of the dressing percentages were observed at doses 0.25 ml per one-liter (51%) and 0.5 ml per one-liter (52%) compared with control (50%). Our findings show significant variations in the final BW, total daily gain, feed consumption, and total feed conversion ratio between NZW and APRI rabbits. Absence of significant differences in the hot carcass weight and dressing percentage between the genetic groups had been reported in this study. Supplementing NZW and APRI rabbits with β-glucan increased blood total protein and globulin. The duodenal villi dimensions, splenic lymphoid diameter, muscular fiber diameter, and muscular glycogen areas were significantly increased by β-glucan administration. Expression of intestinal interleukin-18 (*IL-18*) in NZW rabbits treated with 0.25 and 0.5 doses of β-glucan was significantly upregulated and enhanced the immune response. β-glucan upregulated the expression of intestinal *occludin* mRNA particularly at dose 0.5 β-glucan as well as upregulated intestinal superoxide dismutase 1 (*SOD1*) and glutathione

peroxidase 1 (*GPx1*), which modulates anti-inflammatory and antioxidant properties. In conclusion, oral administration of  $\beta$ -glucan at a dose of 0.25 or 0.5 ml per one-liter drinking water provided beneficial effects in the growth performance and health status of rabbits.

## Introduction

Rabbits meat production is a practical solutions to the growing protein shortage in developing countries [1]. In many European and North African countries, including Egypt, meat is consumed routinely and its production plays a major role in most of those countries' economies [2]. To help resolve the global protein shortage problem, production of rabbits is an appropriate task due to high fertility, low investment costs, a short interval between generations, and the ability to use various forages [3]. Rabbit meats are also highly digestible, delicious, and low-calorie foods that nutritionists often recommend over other meats [4] because rabbit meat is about 20% proteins, unsaturated fatty acids, potassium, phosphorus, and magnesium along with low contents of fat, cholesterol, and sodium [5].

The European Union prohibition of the use of antibiotic growth promoters led to research for various natural feed additives rather than food antibiotics including probiotics, prebiotics, enzymes, and organic acids [6]. A natural feed additive is  $\beta$ -1,3-1,6-glucan, the structural constituent that is present in the cell wall of yeast, fungi, and certain bacteria [7].  $\beta$ -1,3-1,6-glucan can be supplied as alternate feed additive orally and is absorbed by intestinal cells and intestinal lymphoid tissue cells into the gastrointestinal tract, stimulating molecular and humoral immune reaction cells [8]. Advances were noted in immunity by supplementing  $\beta$ -1,3-1,6-glucan in rabbits [9] chicken [10], swine [11], and horse [12].

The current research was therefore carried out to explore the impacts of oral administration on the growth and carcass characteristics, with specific attention paid to their molecular, biochemical, and histopathological changes, in New Zealand White (NZW) and Animal Production Research Institute (APRI) rabbits, two races of weaning rabbits adapted to survive in Egypt.

## Materials and methods

### Ethical statement

The research was endorsed by the Faculty of Veterinary Medicine (Damanhour University, Egypt), committee of Local Experimental Animal Care. During the experiment, all precautions were taken to reduce the animal suffering.

### Animals, management, and the experimental design

A new maternal line (APRI) established from Egyptian Baladi Red (BR) and a Spanish line (V) rabbits was started in 2002 at the Sakha experimental rabbitry, Animal Production Research Institute, Agricultural Research Center, Ministry of Agriculture, Egypt. The APRI line was established by crossing Baladi Red bucks with V line does to produce F1 ( $\frac{1}{2}$ B $\frac{1}{2}$ V) stock, followed by two generations of inter se matings to achieve performance stability. Rabbits of both breeds at the 6<sup>th</sup> week of age and 680 $\pm$ 40 g body weight were allotted randomly into 6 groups (20 rabbits per each). This experiment was carried out at a private farm on these 120 weaned male rabbits of 6 weeks of age (680 $\pm$ 40 g live body weight). Animals were allotted into a

completely randomized design in a  $2 \times 3$  factorial arrangement (two breeds: NZW and APRI, and three levels of  $\beta$ -glucan ( $\beta$ G): 0 (control), 0.25, and 0.5 ml per one-liter drinking water).

Rabbits were reared in a semi-closed rabbitry of 180 m<sup>2</sup> (6 m width and 30 m length) with wire-netted windows in eastern and western sides for natural ventilation. Windows were oriented with an elevation of 160 cm from the floor, which was concrete with moderate slope to middle to facilitate drainage of water and waste liquids towards large gutters to the outside. During cold, windy weather and at night the windows were closed for protection from severe atmosphere.

Rabbits were housed in galvanized wire batteries with standard dimensions (60 x 35 x 35 cm). All cages were supplied with galvanized-steel feeding hoppers and automatic drinkers (nipples). Rabbits were identified by plastic ear tags. Fresh water was offered *ad libitum*. Rabbits were fed on a standard pelleted ration offered *ad libitum* twice daily at 8 am and 2 pm. The pellets were 1 cm length and 0.4 cm diameter. Rabbit cages were regularly cleaned and disinfected. Urine and feces dropped beneath the batteries were removed every day in the morning.

Rabbits from each breed were allocated into 3 groups (20 rabbits each) with one group considered as a control. The treated groups received  $\beta$ -glucan 1,3 pharmaceutical grade 10% concentration at a dose of either 0.25 ml or 0.5 ml per one-liter of drinking water for 3 successive days each week. Each individual rabbit in 0.25 ml  $\beta$ -glucan-treated group was supplemented with 233.25 mg of  $\beta$ -glucan during 10-week experimental period, while in 0.5 ml  $\beta$ -glucan-treated group each rabbit was supplemented with 466.5 mg of  $\beta$ -glucan. Modulin Plus<sup>®</sup> (Micro-Biotech Company, Miami, FL, USA) was used as a source of  $\beta$ -glucan 1,3 pharmaceutical grade (10%).

### Experimental diet

The basal experimental diet was formulated following the NRC [13] and de Blas and Mateos [14] recommendations and then pelleted to satisfy the nutrient requirements of rabbits (Table 1). Ingredients needed for formulation of the experimental diets were finely ground by using hammer mill screen size 3.0 mm, then weighing of different ingredients at required amount for the experimental diets, thoroughly mixed and pelleted (3.5 mm size).

### Growth performance traits

Rabbits were individually weighed at the beginning (6<sup>th</sup> week) and at the 16<sup>th</sup> week of age, then daily weight gain was calculated during the whole period. Weighing was done in the early morning before rabbits received any feed or water. Feed consumption per rabbit was recorded daily. Residues and wasted feed were weighed daily and then subtracted from the offered amounts to obtain the actual accumulated feed consumed, and then the feed conversion ratio (FCR) was calculated. Also, body weight (BW), body weight gain (BWG), and total feed conversion (FC) were determined [15].

### Carcass traits

At the 16<sup>th</sup> week, 3 representative rabbits from each group were randomly taken to estimate the carcass traits. Rabbits were fasted for approximately 6 hours before sacrifice and then individually weighed. Carcass was eviscerated after skinning, and giblets (liver, heart, and kidneys) were removed and weighed to determine the dressed weight and the dressing percentage. All data were recorded as percentage to the live body weight [16].

Dressing percentage was calculated as (hot carcass weight  $\times$  100/fasted weight). Carcass was separated for the following three cuts: (1) two fore legs (including thoracic insertion muscles),

**Table 1. Ingredients and chemical composition (%) of the basal diet.**

| Ingredients                                   | Percentages |
|-----------------------------------------------|-------------|
| Yellow corn                                   | 9.5         |
| Soybean meal 44%                              | 15.0        |
| Wheat bran                                    | 17.0        |
| Barley                                        | 21.7        |
| B. Hay                                        | 34.5        |
| Dicalcium phosphate*                          | 1.2         |
| Ground limestone**                            | 0.25        |
| DL-Methionine                                 | 0.05        |
| Common salt                                   | 0.5         |
| Vitamin + Mineral premix***                   | 0.3         |
| Total                                         | 100         |
| <b>Chemical composition of the basal diet</b> |             |
| Dry matter                                    | 87.8        |
| Moisture                                      | 12.2        |
| Crude protein                                 | 17.9        |
| Crude fiber                                   | 13.75       |
| Ether extract                                 | 3.6         |
| Nitrogen-free extract <sup>‡</sup>            | 42.75       |
| Ash                                           | 9.8         |
| DE (kcal/kg) <sup>§§</sup>                    | 2677.97     |

\* Dicalcium phosphate contains 20% phosphorus and 25% calcium

\*\* Limestone: contains 34% calcium

\*\*\* Every 1 kg of ration contains the following vitamins and minerals: vitamin A– 12000 IU; vitamin D3–900 IU; vitamin E– 50 mg; vitamin k3–2 mg; vitamin B1–2 mg; vitamin B2–6 mg; vitamin B6–2 mg; vitamin B12–0.01 mg; biotin– 0.2 mg; pantothenic– 20 mg; niacin– 50 mg; folic acid– 5 mg; manganese– 8.5 mg; zinc– 70 mg; iron– 75 mg; copper– 5 mg; iodine– 0.75 mg; selenium– 0.1 mg.

<sup>‡</sup> NFE was calculated by difference = 100 –(moisture % + CP% + EE% + CF% + Ash %).

<sup>§§</sup> Digestible energy (DE) was calculated according to values given in the feed composition tables of the NRC [13].

<https://doi.org/10.1371/journal.pone.0234076.t001>

(2) loin (including the abdominal wall and the ribs after the 7<sup>th</sup> thoracic rib), and (3) hind legs (including the sacral bone and the lumber vertebra after the 6<sup>th</sup> lumber vertebra).

### Biochemical assessments

After sacrifice, blood samples ( $n = 5$  for each group) were collected and then tubes were left in slope position until serum samples were separated through centrifugation at 1000 ×g for 20 minutes. The collected sera were subjected to biochemical analyses.

Serum total protein, albumin, alanine aminotransferase (ALT), aspartate aminotransferase (AST), creatinine, and urea were determined using commercial kits according to the manufacturers' instructions (Bio-diagnostic, Giza, Egypt). Serum globulin concentration was calculated by the difference between total protein and albumin, and the albumin/globulin ratios were calculated.

### Histomorphometry

Five samples from five different rabbits of each group of one cm in length were sliced from duodenum, spleen, and pectoral muscle preserved in 4% paraformaldehyde dissolved in PBS. Then,

tissues were prepared using the standard histological technique including dehydration with ascending percentage of ethanol until reaching 100% ethanol. Then, cleared in xylene and melted paraffin ended by embedding in paraffin wax at 65°C. The paraffin blocks were sectioned at 4  $\mu$ m thickness using a microtome, then these sections were stained with Hematoxylin and Eosin (H&E) and for periodic acid schiff (PAS) according to the method of Bancroft and Layton [17].

From each intestinal segment, three sections were used (one section from serial 10 sections). From every section, 5 complete villi having perfect orientation and intact lamina propria were selected indiscriminately for inspection. Therefore, an average of 15 values were obtained for each intestinal sample. Slides were examined under a light microscope (Leica DM500, Leica, Germany) at 4X magnification, supported with a digital camera (Leica EC3). Images were analyzed with an image processing system photo analyzer (Image J; v1.46r, NIH, Bethesda, MD, USA) as described by Schneider et al (2012). The variables calculated for histomorphological modulations were crypt depth (CD), villus height (VH), villus width (VW), and villus height to crypts depth ratio (VH:CD) according to the method of Saeed et al [18] and Kiczorowska et al [19].

Well-oriented germinal center areas in the spleen were combined together and were noted as a percentage of the total field of view at 4X magnification using a Leica light microscope (Madej et al., 2015) and measured as optical density of splenic white pulp by (Image J). Later the average of 3 sections values was determined.

Cross dissections of pectoral muscle were processed, sectioned, and stained for quantification of mean fiber cross-sectional area as previously described Heywood et al [20], and the glycogen area was evaluated according to the protocol of Prats et al [21]. Light photomicrographs at 40X magnification were taken using a Leica light microscope and images were analyzed using Image J.

### Assessment of gene expression

Total RNA was obtained from the samples ( $n = 5$  for each group) using easy-RED Total RNA Extraction Kits (iNtRON Biotechnology, Inc., Korea) as directed by the manufacturer. Agarose gel electrophoresis was used to check the integrity of RNA, and a NanoDrop spectrophotometer was used to analyze the quantities and purities of the samples. First-strand cDNA was obtained using a kit for HiSenScript cDNA (iNtRON Biotechnology, Inc., Korea). Specific primers were used to amplify chosen genes with GAPDH as a housekeeping gene that was stable among the sample groups (Table 2). The mRNA expression was performed using a Strata-gene MX3005P real-time PCR (Agilent Technologies, CA, USA) and TOPreal™ PreMIX SYBR Green qPCR master blend (Enzynomics, Daejeon, Republic of Korea) following the suggestions of the manufacturer. MxPro QPCR Software was used. The relative concentrations of gene expression were assessed using the  $2^{-\Delta\Delta Ct}$  technique as outlined in Pfaffl [22].

### Statistical analysis

The body weight data were normally distributed and subjected to statistical analysis using Two-way analysis of co-variance for initial body weight data; the general linear model (GLM) of the SAS program (SAS Institute, SAS® 2009). The following model was fitted:  $Y_{ijkl} = \mu + W_i + S_j + E_k + SE_{jk} + e_{ijkl}$ , where  $Y_{ijkl}$  = observed value of the concerned treatment,  $\mu$  = observed mean for the concerned treatment,  $W_i$  = effect due to covariance of the initial weight,  $S_j$  = effect due to breed,  $E_k$  = effect due to  $\beta$ -glucan,  $SE_{jk}$  = interaction effect due to breed and  $\beta$ -glucan, and  $e_{ijkl}$  = the error related to individual observation. While, the weight gain, feed consumption and feed conversion data were normally distributed and subjected to statistical analysis using Two-way analysis of variance for initial body weight data; the general linear model (GLM) of the SAS program (SAS Institute, SAS® 2009). The following model was fitted:



Table 2. Primers for gene expression by RT-PCR.

| Genes                                                     | Primer sequence (5'→3')     | Accession No.  |
|-----------------------------------------------------------|-----------------------------|----------------|
| Interleukin-4 ( <i>IL-4</i> )                             | F: CCCAAGAACACAACCGAGAG     | NM_001163177.1 |
|                                                           | R: AGTCTGTCTGGCTTCCTTCC     |                |
| Interleukin-6 ( <i>IL-6</i> )                             | F: TCCAGGAGCCCGACTATGAA     | NM_001082064.2 |
|                                                           | R: TCGTCACTCCTGAACCTGGC     |                |
| Interleukin-10 ( <i>IL-10</i> )                           | F: AGAACCACAGTCCAGCCATC     | NM_001082045.1 |
|                                                           | R: GCTTTGTAGACGCCTTCCTC     |                |
| Interleukin-18 ( <i>IL-18</i> )                           | F: AGAAATGCACCCAGACCA       | NM_001122940.1 |
|                                                           | R: TCTTTCTGTCTGCGAGATGT     |                |
| Interleukin-1β ( <i>IL-1β</i> )                           | F: CCCCAACCGTTACCCAAAGA     | NM_001082201.1 |
|                                                           | R: GGGAACTGGGCAGACTCAA      |                |
| Inducible nitric oxide synthase ( <i>iNOS</i> )           | F: CTCCGAGTACAAGGGCTCC      | XM_017349096.1 |
|                                                           | R: CCTTGCGGACCATCTCTG       |                |
| Interferon-γ ( <i>IFN-γ</i> )                             | F: TCTTGGGTCTTACGGCTGT      | NM_001081991.1 |
|                                                           | R: TGTGTGCTACTCTCTCTTTCCA   |                |
| Superoxide dismutase 1 ( <i>SOD1</i> )                    | F: GCAGGCCCTCACTTTAATCC     | NM_001082627.2 |
|                                                           | R: CCTTTGCCCAAGTCGTCTTC     |                |
| Glutathione peroxidase 1 ( <i>GPx1</i> )                  | F: GCCCAGTCTGTGTACTCCTT     | NM_001085444.1 |
|                                                           | R: CGTTCTCCTGATGCCCAAAC     |                |
| <i>Occludin</i>                                           | F: TGCTTTGTCTTACTGTTTACATGC | GBCI01075279.1 |
|                                                           | R: GGCACAGCACCCAGAATAGT     |                |
| Glyceraldehyde 3-phosphate dehydrogenase ( <i>GAPDH</i> ) | F: TGTTTGTGATGGGCGTGAA      | NM_001082253.1 |
|                                                           | R: CCTCCACAATGCCGAAGT       |                |

<https://doi.org/10.1371/journal.pone.0234076.t002>

$Y_{ijk} = \mu + S_i + E_j + SE_{ij} + e_{ijk}$ , where  $Y_{ijk}$  = observed value of the concerned treatment,  $\mu$  = observed mean for the concerned treatment,  $S_i$  = effect due to breed,  $E_j$  = effect due to β-glucan,  $SE_{ij}$  = interaction effect due to breed and β-glucan, and  $e_{ijk}$  = the error related to individual observation. Differences between means were tested with Duncan's multiple range test at the level of  $\alpha = 0.05$  [23]. The percentages of the studied traits were transformed to Arcsine values and then re-transformed to the original values after analysis. Statistical analysis of gene expression data was done with one-way ANOVA and Tukey's post hoc test for multiple comparisons using with GraphPad prism 5 (San Diego, CA, USA).

## Results

### Growth performance

Results of growth performance (BW, BWG, FC, and FCR) are presented in Table 3. Oral administration of β-glucan at doses 0.25 and 0.5 ml per one-liter drinking water significantly ( $P < 0.05$ ) accelerated BWG in rabbits and reduced FCR in comparison with control. The 0.5 ml per one-liter drinking water β-glucan administration was the best dose for rabbits. There is a remarkable difference in all growth performance traits due to breed effect. The interaction effect between β-glucan and breed was significant on BWG, FC, and FCR and the highest gain and the lowest FCR were noticed in each breed when interacted with β-glucan (Table 3).

### Carcass traits

Findings of carcass traits showed non-significant differences in all carcass traits studied for oral administration of β-glucan, breed, and their interaction (Table 4), except in forequarters,

Table 3. Growth performance of rabbits as affected by breed and  $\beta$ -glucan administration.

| Items                          | Final body weight (g) | Body weight gain (g) | Total feed consumption (g) | Feed conversion ratio (g feed/g gain) |                    |
|--------------------------------|-----------------------|----------------------|----------------------------|---------------------------------------|--------------------|
| Breed effect                   |                       |                      |                            |                                       |                    |
| NZW                            | 2598.84 <sup>a</sup>  | 1819.00 <sup>a</sup> | 5396.33 <sup>b</sup>       | 3.155 <sup>b</sup>                    |                    |
| APRI                           | 2383.16 <sup>b</sup>  | 1726.00 <sup>b</sup> | 6072.33 <sup>a</sup>       | 3.375 <sup>a</sup>                    |                    |
| SEM                            | 4.86                  | 8.47                 | 0.289                      | 0.016                                 |                    |
| P value                        | 0.001                 | 0.001                | 0.001                      | 0.001                                 |                    |
| β-glucan administration        |                       |                      |                            |                                       |                    |
| βG <sub>0.25</sub>             | 2479.71 <sup>b</sup>  | 1769.50 <sup>b</sup> | 5718.00 <sup>b</sup>       | 3.230 <sup>b</sup>                    |                    |
| βG <sub>0.5</sub>              | 2672.97 <sup>a</sup>  | 1939.00 <sup>a</sup> | 5422.50 <sup>c</sup>       | 2.794 <sup>c</sup>                    |                    |
| Control                        | 2320.31 <sup>c</sup>  | 1609.00 <sup>c</sup> | 6062.50 <sup>a</sup>       | 3.770 <sup>a</sup>                    |                    |
| SEM                            | 4.86                  | 8.47                 | 0.289                      | 0.016                                 |                    |
| P value                        | 0.001                 | 0.001                | 0.001                      | 0.001                                 |                    |
| Breed × treatment interactions |                       |                      |                            |                                       |                    |
| NZW                            | Control               | 2255.05 <sup>f</sup> | 1599.00 <sup>d</sup>       | 5853.00 <sup>c</sup>                  | 3.664 <sup>b</sup> |
|                                | βG <sub>0.25</sub>    | 2345.84 <sup>e</sup> | 1692.00 <sup>c</sup>       | 5263.00 <sup>e</sup>                  | 3.112 <sup>d</sup> |
|                                | βG <sub>0.5</sub>     | 2548.58 <sup>c</sup> | 1887.00 <sup>b</sup>       | 5073.00 <sup>f</sup>                  | 2.688 <sup>f</sup> |
| APRI                           | Control               | 2385.57 <sup>d</sup> | 1619.00 <sup>d</sup>       | 6272.00 <sup>a</sup>                  | 3.876 <sup>a</sup> |
|                                | βG <sub>0.25</sub>    | 2613.57 <sup>b</sup> | 1847.00 <sup>b</sup>       | 6173.00 <sup>b</sup>                  | 3.348 <sup>c</sup> |
|                                | βG <sub>0.5</sub>     | 2797.36 <sup>a</sup> | 1991.00 <sup>a</sup>       | 5772.00 <sup>d</sup>                  | 2.900 <sup>e</sup> |
| SEM                            | 4.86                  | 8.47                 | 0.289                      | 0.001                                 |                    |
| P value                        | 0.001                 | 0.001                | 0.001                      | 0.001                                 |                    |

Means within each column for each division with no common superscript letters are significantly different ( $P < 0.05$ ).

SEM = standard error of means,  $\beta$ G =  $\beta$ -glucan

<https://doi.org/10.1371/journal.pone.0234076.t003>

Table 4. Carcass traits of rabbits as affected by breed and  $\beta$ -glucan administration (%).

| Items                          |                    | Forequarter         | Loin  | Hindquarter         | Giblets | Dressing            |
|--------------------------------|--------------------|---------------------|-------|---------------------|---------|---------------------|
| Breed                          |                    |                     |       |                     |         |                     |
| NZW                            |                    | 0.327               | 0.282 | 0.400               | 0.056   | 0.513               |
| APRI                           |                    | 0.325               | 0.272 | 0.399               | 0.050   | 0.510               |
| SEM                            |                    | 0.004               | 0.004 | 0.003               | 0.003   | 0.002               |
| P value                        |                    | 0.81                | 0.19  | 0.76                | 0.25    | 0.38                |
| β-glucan treatment             |                    |                     |       |                     |         |                     |
| βG <sub>0.25</sub>             |                    | 0.325               | 0.280 | 0.402               | 0.056   | 0.51 <sup>a</sup>   |
| βG <sub>0.5</sub>              |                    | 0.332               | 0.281 | 0.405               | 0.051   | 0.52 <sup>a</sup>   |
| Control                        |                    | 0.322               | 0.269 | 0.391               | 0.050   | 0.50 <sup>b</sup>   |
| SEM                            |                    | 0.004               | 0.004 | 0.003               | 0.003   | 0.002               |
| P value                        |                    | 0.52                | 0.32  | 0.13                | 0.58    | 0.002               |
| Breed × treatment interactions |                    |                     |       |                     |         |                     |
| NZW                            | Control            | 0.320 <sup>a</sup>  | 0.270 | 0.383 <sup>b</sup>  | 0.055   | 0.504 <sup>b</sup>  |
|                                | βG <sub>0.25</sub> | 0.329 <sup>a</sup>  | 0.280 | 0.400 <sup>ab</sup> | 0.056   | 0.514 <sup>ab</sup> |
|                                | βG <sub>0.5</sub>  | 0.332 <sup>a</sup>  | 0.295 | 0.419 <sup>a</sup>  | 0.057   | 0.522 <sup>a</sup>  |
| APRI                           | Control            | 0.315 <sup>b</sup>  | 0.267 | 0.392 <sup>b</sup>  | 0.045   | 0.500 <sup>b</sup>  |
|                                | βG <sub>0.25</sub> | 0.317 <sup>ab</sup> | 0.281 | 0.399 <sup>ab</sup> | 0.048   | 0.510 <sup>ab</sup> |
|                                | βG <sub>0.5</sub>  | 0.344 <sup>a</sup>  | 0.268 | 0.405 <sup>ab</sup> | 0.056   | 0.520 <sup>a</sup>  |
| SEM                            |                    | 0.004               | 0.004 | 0.003               | 0.003   | 0.002               |
| P value                        |                    | 0.05                | 0.21  | 0.02                | 0.71    | 0.05                |

Means within each column for each division with no common superscript letters are significantly different ( $P < 0.05$ ).

<https://doi.org/10.1371/journal.pone.0234076.t004>

Table 5. Biochemical parameters of rabbits as affected by breed and β-glucan administration.

| Items                          | TP                 | Albumin | Globulin | ALT   | AST                | Uric acid         | Urea               | Creatinine | A/G Ratio |      |
|--------------------------------|--------------------|---------|----------|-------|--------------------|-------------------|--------------------|------------|-----------|------|
| Breed                          |                    |         |          |       |                    |                   |                    |            |           |      |
| NZW                            | 6.03               | 3.42    | 2.60     | 25.15 | 13.36              | 2.69 <sup>b</sup> | 24.59              | 0.84       | 1.39      |      |
| APRI                           | 6.27               | 3.55    | 2.72     | 22.39 | 11.71              | 3.02 <sup>a</sup> | 27.80              | 0.86       | 1.52      |      |
| SEM                            | 0.22               | 0.13    | 0.17     | 1.03  | 0.69               | 0.05              | 1.4                | 0.02       | 0.11      |      |
| <i>P</i> value                 | 0.58               | 0.64    | 0.73     | 0.19  | 0.24               | 0.004             | 0.07               | 0.53       | 0.57      |      |
| β-glucan treatment             |                    |         |          |       |                    |                   |                    |            |           |      |
| βG0.25                         | 6.05               | 3.29    | 2.73     | 20.59 | 12.61              | 3.04 <sup>a</sup> | 29.59              | 0.85       | 1.32      |      |
| βG <sub>0.5</sub>              | 6.34               | 3.44    | 2.90     | 25.91 | 11.38              | 3.04 <sup>a</sup> | 24.62              | 0.86       | 1.31      |      |
| Control                        | 6.08               | 3.72    | 2.35     | 24.82 | 13.61              | 2.49 <sup>b</sup> | 27.38              | 0.84       | 1.76      |      |
| SEM                            | 0.22               | 0.13    | 0.17     | 1.03  | 0.69               | 0.05              | 1.4                | 0.02       | 0.11      |      |
| <i>P</i> value                 | 0.82               | 0.43    | 0.42     | 0.11  | 0.44               | 0.001             | 0.36               | 0.92       | 0.20      |      |
| Breed × treatment interactions |                    |         |          |       |                    |                   |                    |            |           |      |
| NZW                            | Control            | 5.92    | 3.11     | 2.23  | 20.25 <sup>b</sup> | 15.14             | 2.28 <sup>c</sup>  | 25.77      | 0.83      | 1.74 |
|                                | βG <sub>0.25</sub> | 5.93    | 3.69     | 2.80  | 21.09 <sup>b</sup> | 11.97             | 2.96 <sup>ab</sup> | 28.23      | 0.86      | 1.15 |
|                                | βG <sub>0.5</sub>  | 6.24    | 3.47     | 2.78  | 34.11 <sup>a</sup> | 12.97             | 2.84 <sup>ab</sup> | 19.78      | 0.84      | 1.30 |
| APRI                           | Control            | 6.24    | 3.42     | 2.48  | 29.39 <sup>a</sup> | 12.07             | 2.70 <sup>b</sup>  | 28.99      | 0.88      | 1.78 |
|                                | βG <sub>0.25</sub> | 6.13    | 3.46     | 2.66  | 20.09 <sup>b</sup> | 13.26             | 3.12 <sup>a</sup>  | 30.94      | 0.86      | 1.48 |
|                                | βG <sub>0.5</sub>  | 6.45    | 3.76     | 3.02  | 17.71 <sup>b</sup> | 9.79              | 3.23 <sup>a</sup>  | 29.45      | 0.84      | 1.31 |
| SEM                            |                    | 0.22    | 0.13     | 0.17  | 1.03               | 0.69              | 0.05               | 1.4        | 0.02      | 0.11 |
| <i>P</i> value                 |                    | 0.98    | 0.79     | 0.81  | 0.001              | 0.40              | 0.001              | 0.27       | 0.954     | 0.54 |

Means within each column for each division with no common superscript letters are significantly different ( $P < 0.05$ ).

SEM = standard error of the mean.

<https://doi.org/10.1371/journal.pone.0234076.t005>

hindquarters, and dressing percentages ( $P < 0.05$ ) due to the interaction between β-glucan and breed. The highest percentages of forequarters, hindquarters, and dressing percentages were obtained from NZW when administered with 0.5% β-glucan (33.2%, 41.9%, and 52.2%, respectively).

### Biochemical analyses

Administering rabbits with β-glucan at a dose 0.5 ml per one-liter drinking water increased blood total protein and globulin values (Table 5). β-glucan significantly increased uric acid in comparison with control, while urea and creatinine levels were non-significantly changed

### Histomorphometry

Mucosal histomorphometric studies revealed significantly ( $P < 0.05$ ) higher VH in duodenum of groups treated with 0.5% β-glucan compared with control (Table 6) and (Fig 1). Moreover, higher VH:CD ratio was observed in duodenum of these groups. Furthermore, the number of infiltrated lymphocytes into the intestinal epithelium increased significantly in groups administered with 0.25% and 0.5% β-glucan compared with control (Table 6, Fig 2) with highest values in 0.5% β-glucan.

Germinal center areas of spleen in groups administered with 0.25% and 0.5% β-glucan increased ( $P < 0.05$ ) compared with control (Table 7, Fig 3).

The mean fiber cross-sectional area of pectoral muscles and the glycogen areas were significantly improved in groups administered with 0.25% and 0.5% β-glucan (Table 8, Fig 4).



Table 6. Histomorphometric changes of rabbits' duodenum as affected by breed and  $\beta$ -glucan administration ( $\mu$ m).

| Items                                 | Villus height             | Villus width          | Crypt depth          | VH/CD  | No. of lymphocytes/villi |
|---------------------------------------|---------------------------|-----------------------|----------------------|--------|--------------------------|
| Breed                                 |                           |                       |                      |        |                          |
| NZW                                   | 877.89 <sup>a</sup>       | 118.51 <sup>a</sup>   | 105.78               | 9.02   | 95.778                   |
| APRI                                  | 762.83 <sup>b</sup>       | 93.39 <sup>b</sup>    | 110.98               | 7.31   | 99.556                   |
| SEM                                   | 18.06                     | 3.78                  | 5.17                 | 0.454  | 1.155                    |
| <i>P</i> value                        | 0.004                     | 0.002                 | 0.647                | 0.072  | 0.128                    |
| $\beta$ -glucan treatment             |                           |                       |                      |        |                          |
| $\beta$ G <sub>0.25</sub>             | 785.03 <sup>b</sup>       | 106.60                | 104.25               | 8.29   | 89.500 <sup>b</sup>      |
| $\beta$ G <sub>0.5</sub>              | 930.89 <sup>a</sup>       | 106.44                | 111.38               | 8.94   | 126.00 <sup>a</sup>      |
| Control                               | 745.15 <sup>b</sup>       | 103.30                | 109.52               | 7.25   | 77.500 <sup>c</sup>      |
| SEM                                   | 18.06                     | 3.78                  | 5.17                 | 0.454  | 1.155                    |
| <i>P</i> value                        | 0.001                     | 0.925                 | 0.863                | 0.329  | 0.001                    |
| Breed $\times$ treatment interactions |                           |                       |                      |        |                          |
| NZW                                   | Control                   | 801.19 <sup>bcd</sup> | 121.36 <sup>a</sup>  | 112.16 | 73.333 <sup>c</sup>      |
|                                       | $\beta$ G <sub>0.25</sub> | 847.94 <sup>bc</sup>  | 127.29 <sup>a</sup>  | 100.07 | 88.333 <sup>b</sup>      |
|                                       | $\beta$ G <sub>0.5</sub>  | 984.52 <sup>a</sup>   | 106.86 <sup>ab</sup> | 105.11 | 125.667 <sup>a</sup>     |
| APRI                                  | Control                   | 689.11 <sup>d</sup>   | 85.23 <sup>b</sup>   | 106.87 | 81.667 <sup>bc</sup>     |
|                                       | $\beta$ G <sub>0.25</sub> | 722.11 <sup>cd</sup>  | 85.92 <sup>b</sup>   | 108.42 | 90.667 <sup>b</sup>      |
|                                       | $\beta$ G <sub>0.5</sub>  | 877.27 <sup>ab</sup>  | 106.01 <sup>ab</sup> | 117.65 | 126.333 <sup>a</sup>     |
| SEM                                   |                           | 18.06                 | 3.78                 | 5.17   | 0.454                    |
| <i>P</i> value                        |                           | 0.001                 | 0.015                | 0.949  | 0.296                    |

Means within each column for each division with no common superscript letters are significantly different ( $P < 0.05$ ).

VH/CD = Villus height/Crypt depth

<https://doi.org/10.1371/journal.pone.0234076.t006>

## Gene expression assessment

In comparison with the control group, the expressions of intestinal interleukin-18 (*IL-18*) (Fig 5C) in NZW rabbits administered with 0.25 and 0.5  $\beta$ -glucan were substantially upregulated. However, in separate treatment groups, there is no important impact on the expression of intestinal *IL-4*, *IL-10*, and interferon- $\gamma$  (*IFN- $\gamma$* ) (Fig 1A, 1B and 1D). Rabbits in NZW+ $\beta$ G<sub>0.25</sub> and NZW+ $\beta$ G<sub>0.5</sub> groups displayed significant upregulations ( $P < 0.01$ ) in the expression of intestinal superoxide dismutase 1 (*SOD1*) (Fig 1E) in relation to the control group. In addition, 0.5  $\beta$ -glucan treated group demonstrated significant upregulation ( $P < 0.001$ ) of expression of intestinal glutathione peroxidase 1 (*GPx1*) (Fig 5F) compared with the other group. In addition, the NZW+ $\beta$ G<sub>0.5</sub> group showed significant increases ( $P < 0.05$ ) in intestinal *occludin* expression compared with the other groups (Fig 5G). NZW rabbit's mRNA expression of splenic *IL-1 $\beta$* , *IL-6*, and inducible nitric oxide synthase (*iNOS*) shows no important distinction compared with control (Fig 6A, 6B and 6C).

In APRI breed both 0.25 and 0.5  $\beta$ -glucan treated groups showed no significant effect on expression levels of intestinal *IL-4*, *IL-6*, *IL-18*, and *IFN- $\gamma$*  genes (Fig 7A, 7B, 7C and 7D) as well as splenic *IL-1 $\beta$* , *IL-6*, and *iNOS* (Fig 4). However, in comparison with control, 0.5  $\beta$ -glucan treated group shows significant upregulation ( $P < 0.001$ ) of both *SOD1* (Fig 3E) and *GPx1* (Fig 7F) mRNA expression, while 0.25  $\beta$ -glucan treated group showed significant increases ( $P < 0.05$ ) in *GPx1* expression. The 0.5  $\beta$ -glucan treated group showed significant increases ( $P < 0.05$ ) in intestinal *occludin* expression in comparison with control (Fig 7G).

Splenic mRNA expression of *IL-1 $\beta$* , *IL-6*, and *iNOS* revealed no significant changes in comparison with control APRI rabbits (Fig 8A, 8B and 8C).

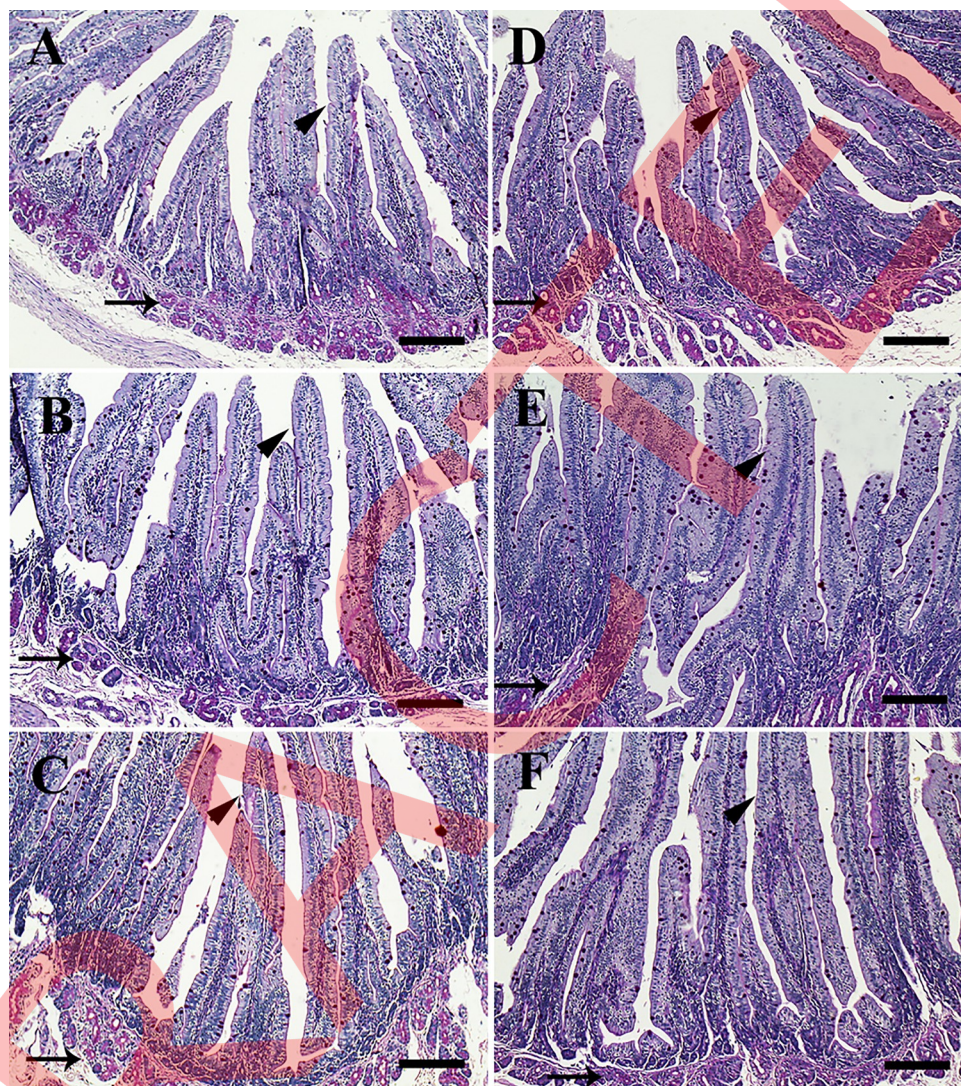

**Fig 1.** Light micrographs of duodenum revealing the effect of different doses of  $\beta$  glucan; control, 0.25 g  $\beta$  glucan ( $\beta G_{0.25}$ ), 0.5 g  $\beta$  glucan ( $\beta G_{0.5}$ ) on the two rabbit species; New Zealand White (NZW) and APRI rabbits were represented in (A to C) and from (D to F), respectively. The micrographs showing the increasing in the villi height (VH) from (A to C) and from (D to F). Villi (arrowheads), Brunner's gland (arrows). PAS stain. Scale bar is 400  $\mu$ m.

<https://doi.org/10.1371/journal.pone.0234076.g001>

## Discussion

Dietary  $\beta$ -glucan administration brought some improvements in animal development and health status [24–26]. Also,  $\beta$ -glucan is considered as an alternative to antibiotics and improves the survival and performance of broilers [27]. In the current study,  $\beta$ -glucan oral administration improved growth performance of NZW and APRI rabbits. Increased efficiency by the nutritional supplement of yeast  $\beta$ -glucan in growing rabbits can lead to increased digestibility and absorption of feedstuffs [28,29]. In addition, improved intestinal health was revealed to increase the villus height, reflecting improved growth efficiency. [30]. In agreement with the current study, Shehata et al [29], Ezema and Eze [31], Bhatt et al [32], and El-Badawi et al [33] found enhancement in BWG and FCR of rabbits administrated with *S. cerevisiae* and probiotic.



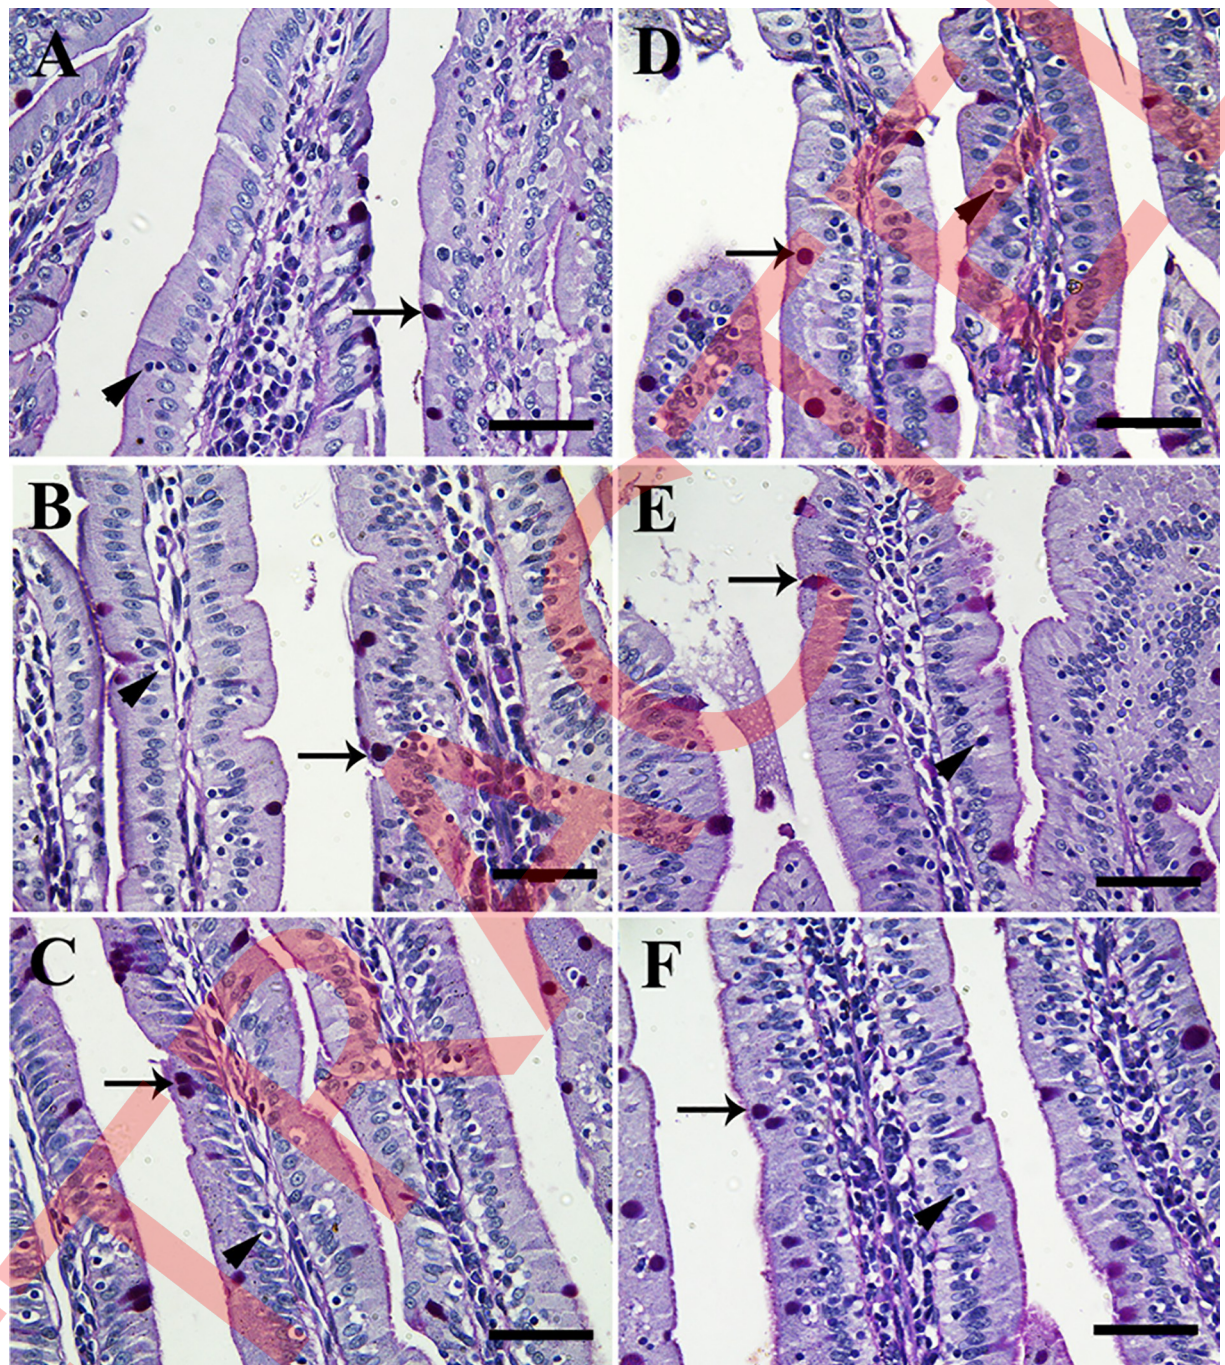

**Fig 2.** Light micrographs of duodenum showing the effect of different doses of  $\beta$  glucan; control, 0.25 g  $\beta$  glucan ( $\beta G_{0.25}$ ), 0.5 g  $\beta$  glucan ( $\beta G_{0.5}$ ) on the two rabbit species; New Zealand White (NZW) and APRI rabbits were represented in (A to C) and from (D to F), respectively. The micrographs revealing the different epithelial lymphocytic infiltration from (A to C) and from (D to F). Lymphocytes (arrowheads) and goblet cells (arrows). PAS stain. Scale bar is 50  $\mu$ m.

<https://doi.org/10.1371/journal.pone.0234076.g002>

Some studies support the idea of using prebiotics for increasing the length of the intestinal villus and enhancing immunity [34,35]. Also, this leads to better nutrient absorption, and consequently increases body weight [36]. The enhanced villi height to crypt depth, which would

Table 7. Averages of total splenic white pulp areas/ 3 mm<sup>2</sup>.

| Items                                 |                           | Total splenic white pulp area |
|---------------------------------------|---------------------------|-------------------------------|
| Breed                                 |                           |                               |
| NZW                                   |                           | 44811.79 <sup>a</sup>         |
| APRI                                  |                           | 30146.46 <sup>b</sup>         |
| SEM                                   |                           | 1869.503                      |
| P value                               |                           | 0.002                         |
| $\beta$ -glucan treatment             |                           |                               |
| $\beta$ G <sub>0.25</sub>             |                           | 45430.136 <sup>a</sup>        |
| $\beta$ G <sub>0.5</sub>              |                           | 40873.803 <sup>a</sup>        |
| Control                               |                           | 26133.440 <sup>b</sup>        |
| SEM                                   |                           | 1869.503                      |
| P value                               |                           | 0.003                         |
| Breed $\times$ treatment interactions |                           |                               |
| NZW                                   | Control                   | 34570.902 <sup>b</sup>        |
|                                       | G <sub>0.25</sub>         | 60290.571 <sup>a</sup>        |
|                                       | $\beta$ G <sub>0.5</sub>  | 39573.901 <sup>b</sup>        |
| APRI                                  | Control                   | 17695.979 <sup>c</sup>        |
|                                       | $\beta$ G <sub>0.25</sub> | 30569.700 <sup>bc</sup>       |
|                                       | $\beta$ G <sub>0.5</sub>  | 42173.704 <sup>b</sup>        |
| SEM                                   |                           | 1869.503                      |
| P value                               |                           | 0.001                         |

Means within each column for each division with no common superscript letters are significantly different ( $P < 0.05$ ).

<https://doi.org/10.1371/journal.pone.0234076.t007>

permit higher nutrient intake, may explain enhanced growth efficiency as a response to  $\beta$ -glucans [10,37] and improved intestinal barrier function [38]. Seyidoglu and Peker [39] demonstrated significant increases in thickness of the mucosa, villus heights, crypt depths, and gland depths in rabbits fed diets administrated with yeast that contains  $\beta$ -glucan. A high V/C ratio indicates sufficiently matured and functionally active epithelial cells [40]. In this study, the longest villi values for duodenum were recorded for 0.5  $\beta$ -glucan, followed by 0.25  $\beta$ -glucan for both breeds and reflects the absorptive capacity of the intestine.

The present study detected increases of white pulp areas by 0.25 G  $\beta$ -glucan, which reflect on the increase of rabbit immunity. Increased fatty acid utilization due to  $\beta$ -glucan treatment in high fat diet fed mice has been stated by Miyamoto et al [41] and led to a decreased glycogen depletion rate and increased glycogen accumulation in the liver and muscle [42]. Xu et al [43] observed a significant increase in non-esterified fatty acids' concentration in  $\beta$ -glucan feeding rats, which indicates that  $\beta$ -glucan improves muscle quality due to the increased availability of glycogen. Interestingly, our results showed the significant increase of fiber cross-sectional area of pectoral muscles in 0.5  $\beta$ -glucan groups. Moreover, glycogen areas were higher in 0.5 G  $\beta$ -glucan of NZW breed and 0.25  $\beta$ -glucan of APRI breed owing to the higher proportion of high glycogen muscle fibers compared to low glycogen muscle fibers. Therefore,  $\beta$ -glucan could improve the meat quality of rabbits.

Concerning the biochemical findings, ElSawy et al [24] reported that oral administration of yeast  $\beta$ -glucan did not alter serum protein, albumin, and globulin of chicks in comparison with control chicks. Belhassen et al [44] reported that dietary administration of *S. cerevisiae* did not alter blood parameters of growing rabbits. The increased uric acid levels in  $\beta$ -glucan-administrated groups may be due to enhancement of purine metabolism and not due to



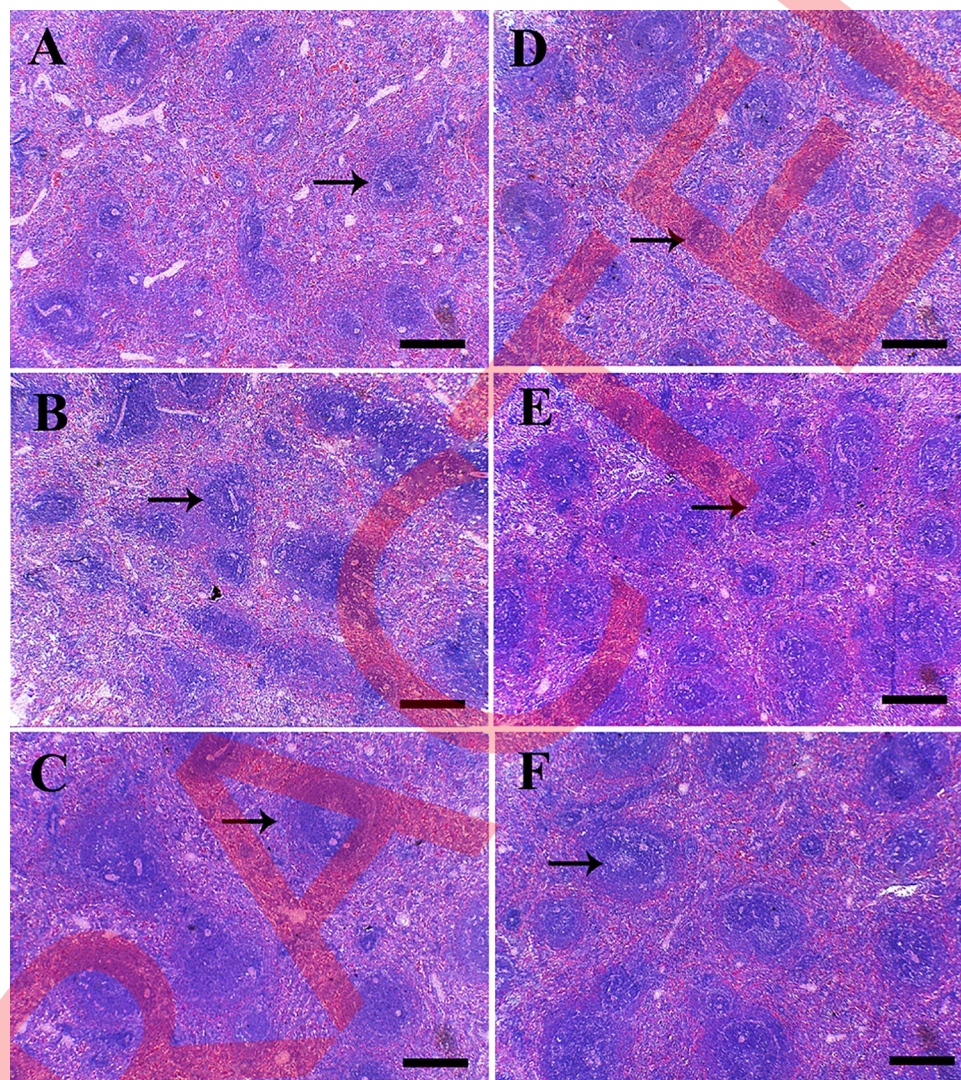

**Fig 3.** Light micrographs of spleen showing the effect of different doses of  $\beta$  glucan; control, 0.25 g  $\beta$  glucan ( $\beta G_{0.25}$ ), 0.5 g  $\beta$  glucan ( $\beta G_{0.5}$ ) on the two rabbit species; New Zealand White (NZW) and APRI rabbits were represented in (A to C) and from (D to F), respectively. The micrographs revealing the increasing in the whole white pulp areas and the lymphoid nodules (arrows) diameter from (A to C) and from (D to F). H and E stain. Scale bar is 400  $\mu$ m.

<https://doi.org/10.1371/journal.pone.0234076.g003>

increased kidney function because urea and creatinine levels did not have any changes compared with control.

IL-18 operates to induce a Th1-mediated reaction after exposure to a pathogen in association with IL-12 [45]. An initial increase in intestinal IL-18 gene expression was observed in an unchallenged study on day 7 due to dietary  $\beta$ -glucan, followed by a downregulation on day 14. These findings were consistent with our research, which revealed that the expression of intestinal *IL-18* in NZW rabbit treated with 0.25 and 0.5  $\beta$ -glucan was considerably upregulated with respect to the control group. IL-18 is an IL-1 family cytokine that has been proposed to promote barrier function in the intestine that improved the gut health against pathogens [46]. In a subsequent research, the expression of IL-18 in birds' jejunums fed the  $\beta$ -glucan diet was improved [47].

Table 8. Mean of muscle fiber cross-sectional area ( $\mu\text{m}^2$ ) and glycogen area/300  $\mu\text{m}^2$ .

| Items                                       |                        | Muscle fiber cross-sectional area | Glycogen area        |
|---------------------------------------------|------------------------|-----------------------------------|----------------------|
| Breed                                       |                        |                                   |                      |
| NZW                                         |                        | 2330.79 <sup>a</sup>              | 728.10 <sup>a</sup>  |
| APRI                                        |                        | 2048.90 <sup>b</sup>              | 454.11 <sup>b</sup>  |
| SEM                                         |                        | 62.56                             | 54.06                |
| P value                                     |                        | 0.02                              | 0.02                 |
| $\beta$ -glucan treatment                   |                        |                                   |                      |
| $\beta\text{G}_{0.25}$ 2257.75 <sup>b</sup> |                        |                                   | 762.97 <sup>a</sup>  |
| $\beta\text{G}_{0.5}$                       |                        | 2672.75 <sup>a</sup>              | 837.75 <sup>a</sup>  |
| Control                                     |                        | 1639.53 <sup>c</sup>              | 172.88 <sup>b</sup>  |
| SEM                                         |                        | 62.56                             | 54.06                |
| P value                                     |                        | 0.01                              | 0.01                 |
| Breed $\times$ treatment interactions       |                        |                                   |                      |
| NZW                                         | Control                | 1775.40 <sup>bc</sup>             | 108.45 <sup>c</sup>  |
|                                             | $\beta\text{G}_{0.25}$ | 2502.11 <sup>a</sup>              | 1099.70 <sup>a</sup> |
|                                             | $\beta\text{G}_{0.5}$  | 2714.86 <sup>a</sup>              | 976.14 <sup>a</sup>  |
| APRI                                        | Control                | 1503.65 <sup>c</sup>              | 237.30 <sup>c</sup>  |
|                                             | $\beta\text{G}_{0.25}$ | 2013.40 <sup>b</sup>              | 425.64 <sup>bc</sup> |
|                                             | $\beta\text{G}_{0.5}$  | 2629.66 <sup>a</sup>              | 699.37 <sup>ab</sup> |
| SEM                                         |                        | 62.56                             | 54.06                |
| P value                                     |                        | 0.01                              | 0.01                 |

Means within each column for each division with no common superscript letters are significantly different ( $P < 0.05$ ).

<https://doi.org/10.1371/journal.pone.0234076.t008>

Our outcome shows that there is no important impact on the expression levels of intestinal interleukin-4 (*IL-4*), *IL-10*, and splenic *IL-6* in separate treatment groups and that the amount of expression of splenic *IL-1 $\beta$* , *IL-6*, and inducible nitric oxide synthase (*iNOS*) in NZ and APRI rabbits shows no important distinction in the control group. The proinflammatory cytokine *IL-1* secretion is enhanced by  $\beta$ -glucan [48]. Contradictory information was gathered in mammals where concentrations of *IL-6* and *TNF- $\alpha$*  in  $\beta$ -glucan-fed pigs subjected to lipopolysaccharide decreased relative to their controls [49]. Similar outcomes were noted where intramuscular injection of  $\beta$ -glucan in Wistar rats blocked *TNF- $\alpha$* , *IL-1 $\beta$* , and *IL-6* elevations observed in the control group following sepsis-induced lung injury [50].

When exposed to antigens or chemotactic agents, macrophages start to build *iNOS*. This enzyme contributes to the development of nitric oxide that then binds to toxic derivatives with superoxide anions, allowing macrophages to skillfully destroy a few kinds of pathogens [51]. Our outcome showed that there were no changes in the splenic *iNOS* expression rate of mRNA in both NZW and APRI. Cox et al [52] They found no important variations in the rate of expression of the *iNOS* gene.

Cellular GSH is an essential cellular antioxidant molecule that aids in scavenging of radical species or involvement in antioxidant enzyme catalyzed responses such as GPx [53]. Also, SOD is a critical antioxidant enzyme that protects the cells from the harmful effects of superoxide anion radical [54]. Pretreatment with melatonin or  $\beta$ -D-glucan lowered the harm caused by acetaminophen-induced hepatotoxicity by decreasing oxidative pressure and growing antioxidant activity of GPx, SOD, and catalase (CAT), because melatonin or  $\beta$ -glucan are recognized as free-radical scavengers [55].



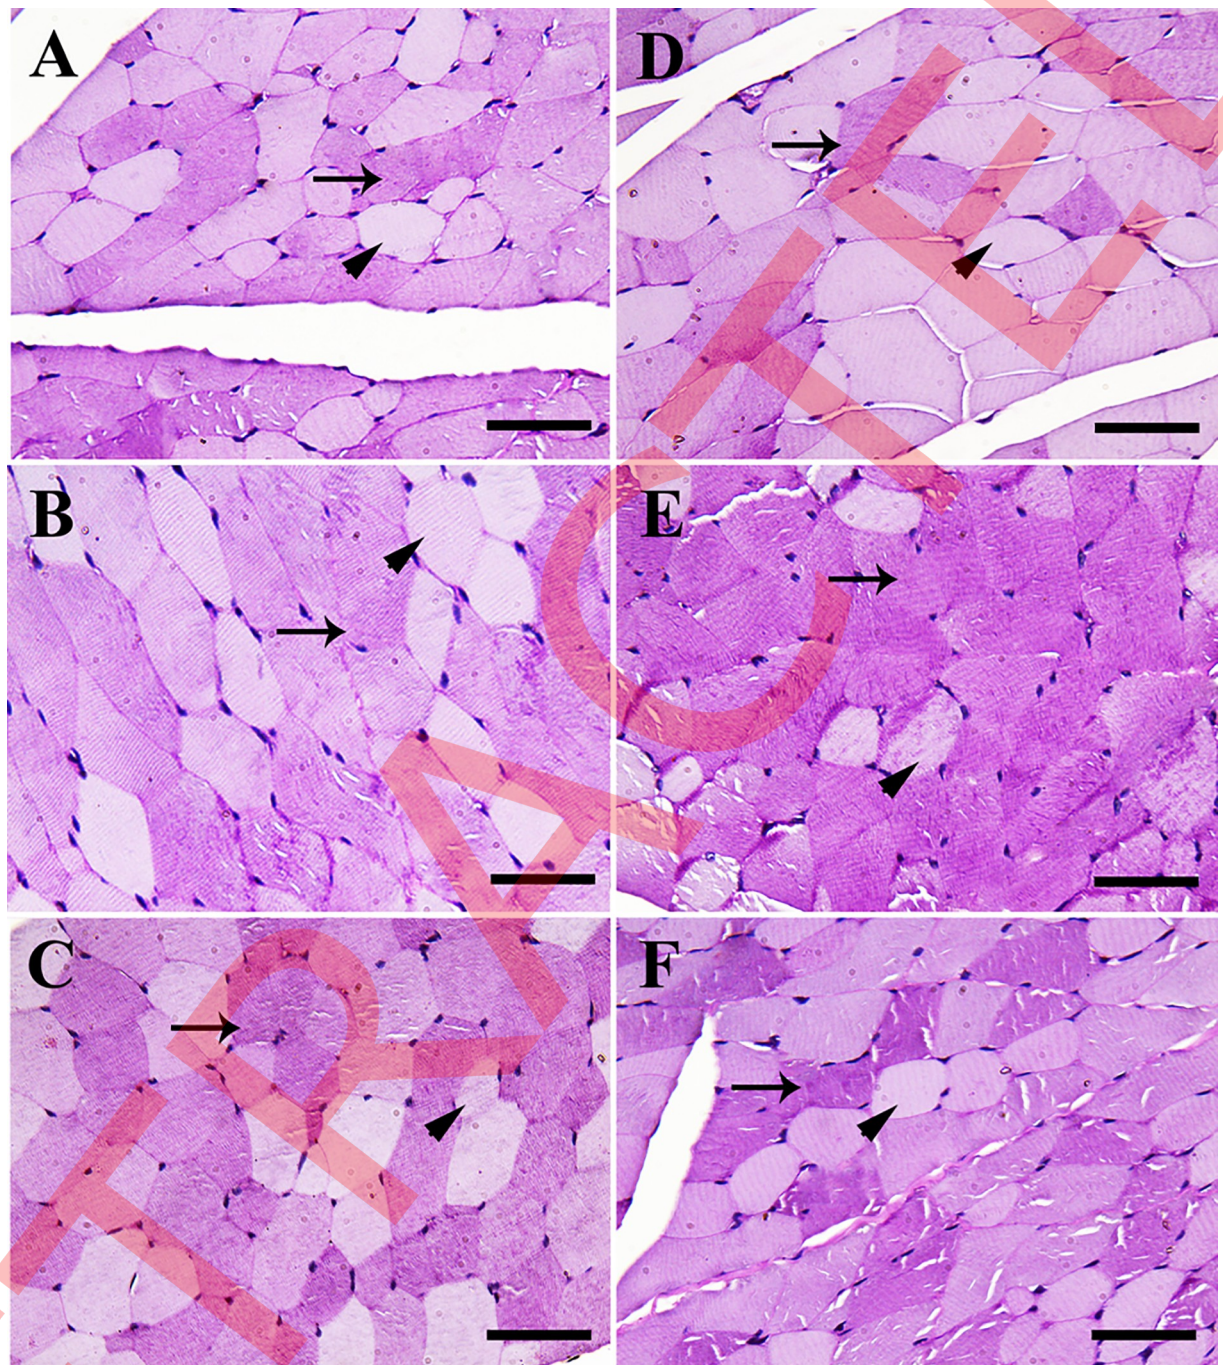

**Fig 4.** Light micrographs of muscle showing the effect of different doses of  $\beta$  glucan; control, 0.25 g  $\beta$  glucan ( $\beta G_{0.25}$ ), 0.5 g  $\beta$  glucan ( $\beta G_{0.5}$ ) on the two rabbit species; New Zealand White (NZW) and APRI rabbits were represented in (A to C) and from (D to F), respectively. The micrographs revealing the different glycogen content and muscle fiber cross-sectional area from (A to C) and from (D to F). Low glycogen muscle fibers (arrowheads) and high glycogen muscle fibers (arrows). PAS stain. Scale bar is 50  $\mu$ m.

<https://doi.org/10.1371/journal.pone.0234076.g004>

Tight junctions consist of at least three types of transmembrane proteins: *occludin*, claudins, and molecules of junctional adhesion. *Occludin* and the family of claudins are the most significant elements of epithelial barrier function in the intestine [56]. Results also indicated that  $\beta$ -glucan upregulated the expression of the intestinal *occludin* mRNA, especially at 0.5  $\beta$ -glucan

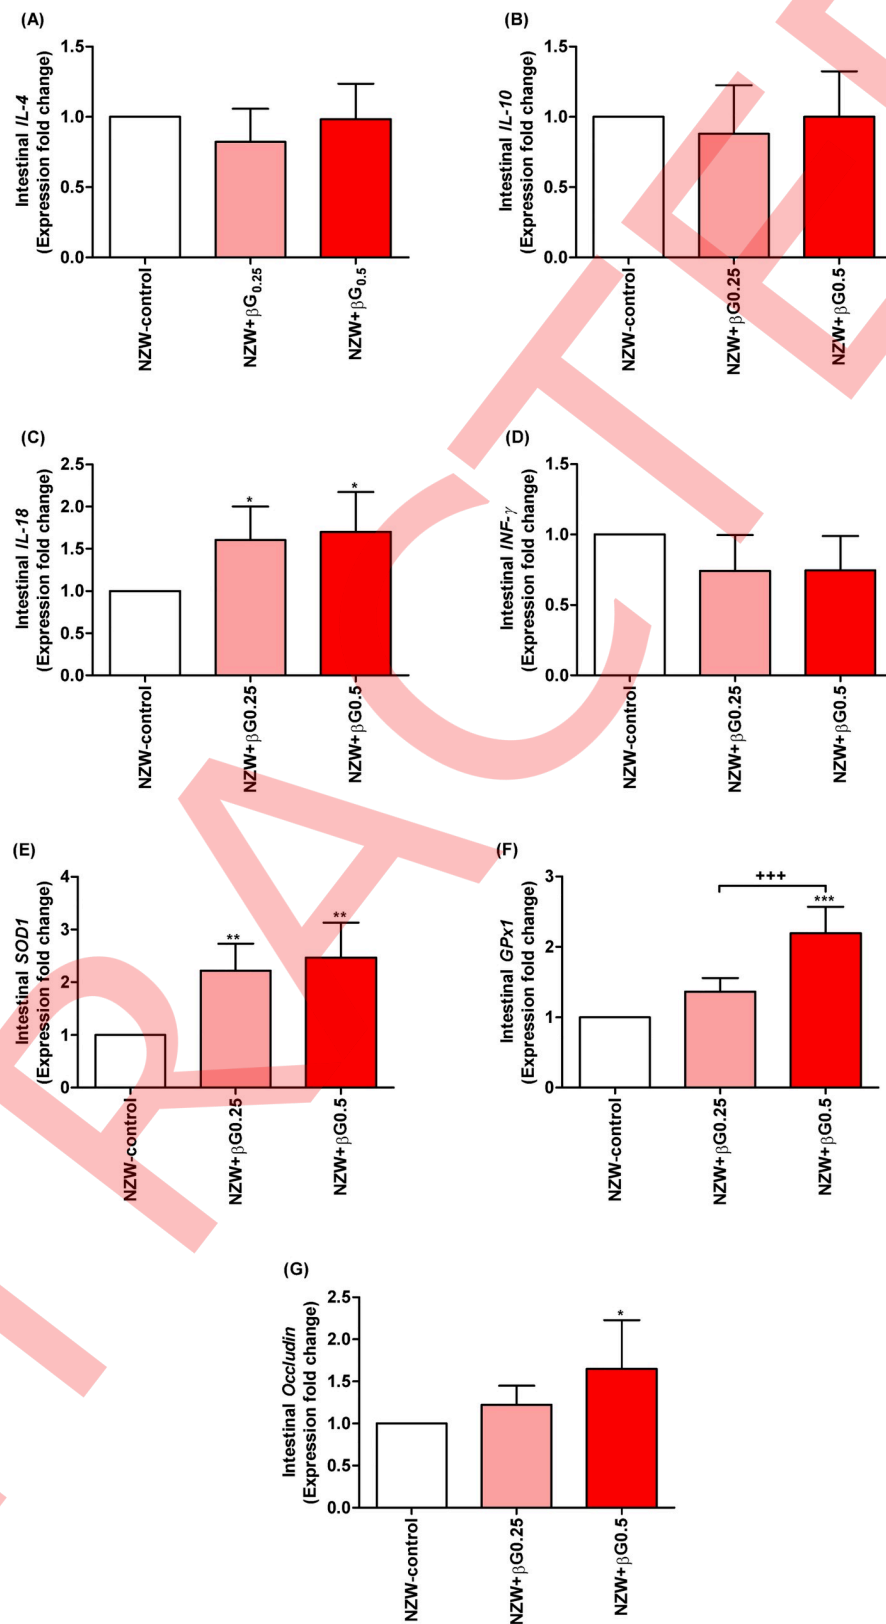

**Fig 5.** RT-PCR validation of the intestinal (A) interleukin-4 (*IL-4*), (B) interleukin-10 (*IL-10*), (C) interleukin-18 (*IL-18*), (D) interferon- $\gamma$  (*IFN- $\gamma$* ), (E) superoxide dismutase 1 (*SOD1*), (F) glutathione peroxidase 1 (*GPx1*), and (G) *occludin* genes in NZW rabbits. \* $P$  < 0.05, \*\* $P$  < 0.01 and \*\*\* $P$  < 0.001 vs. control. \*\*\*\* $P$  < 0.001 vs. NZW+ $\beta$ G0.25. Statistical analysis was performed using one-way ANOVA and Tukey's post hoc test for multiple comparisons.

<https://doi.org/10.1371/journal.pone.0234076.g005>

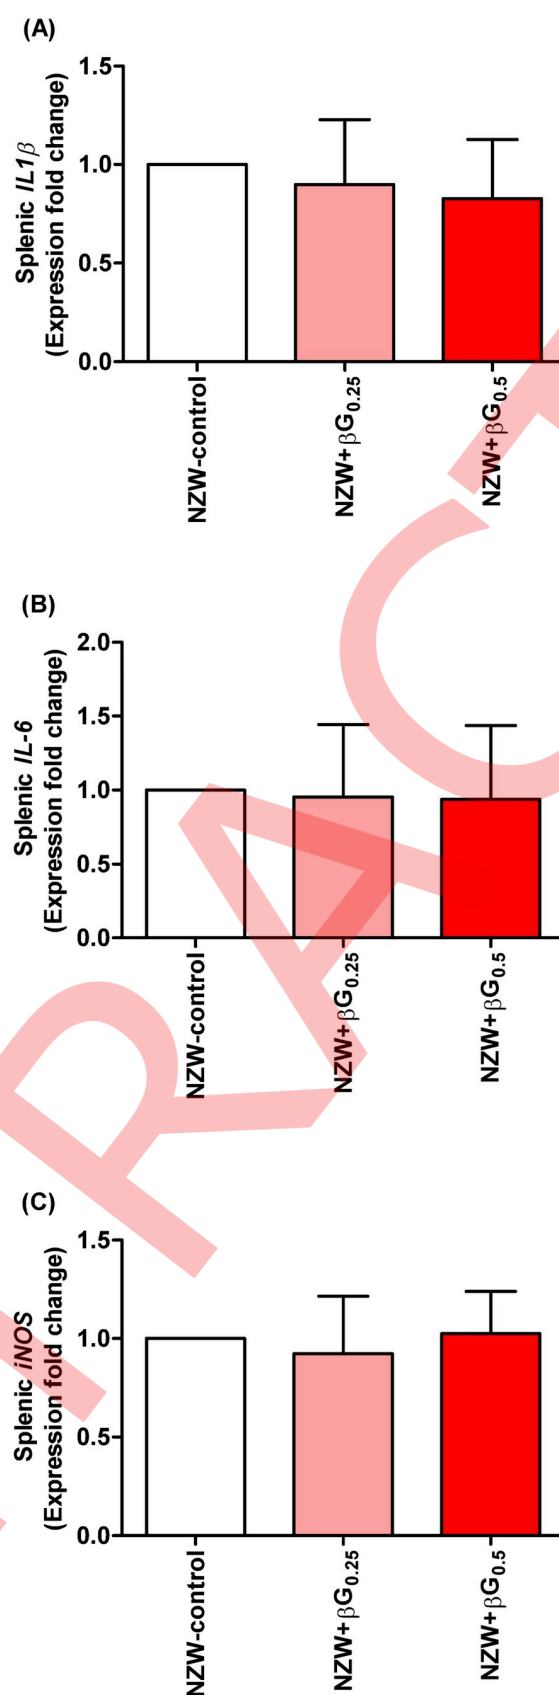

**Fig 6.** RT-PCR validation of the splenic (A) interleukin-1beta (*IL1 $\beta$* ), (B) interleukin-6 (*IL-6*), and (C) inducible nitric oxide synthase (*iNOS*) genes in NZW rabbits. Statistical analysis was performed using one-way ANOVA and Tukey's post hoc test for multiple comparisons.

<https://doi.org/10.1371/journal.pone.0234076.g006>



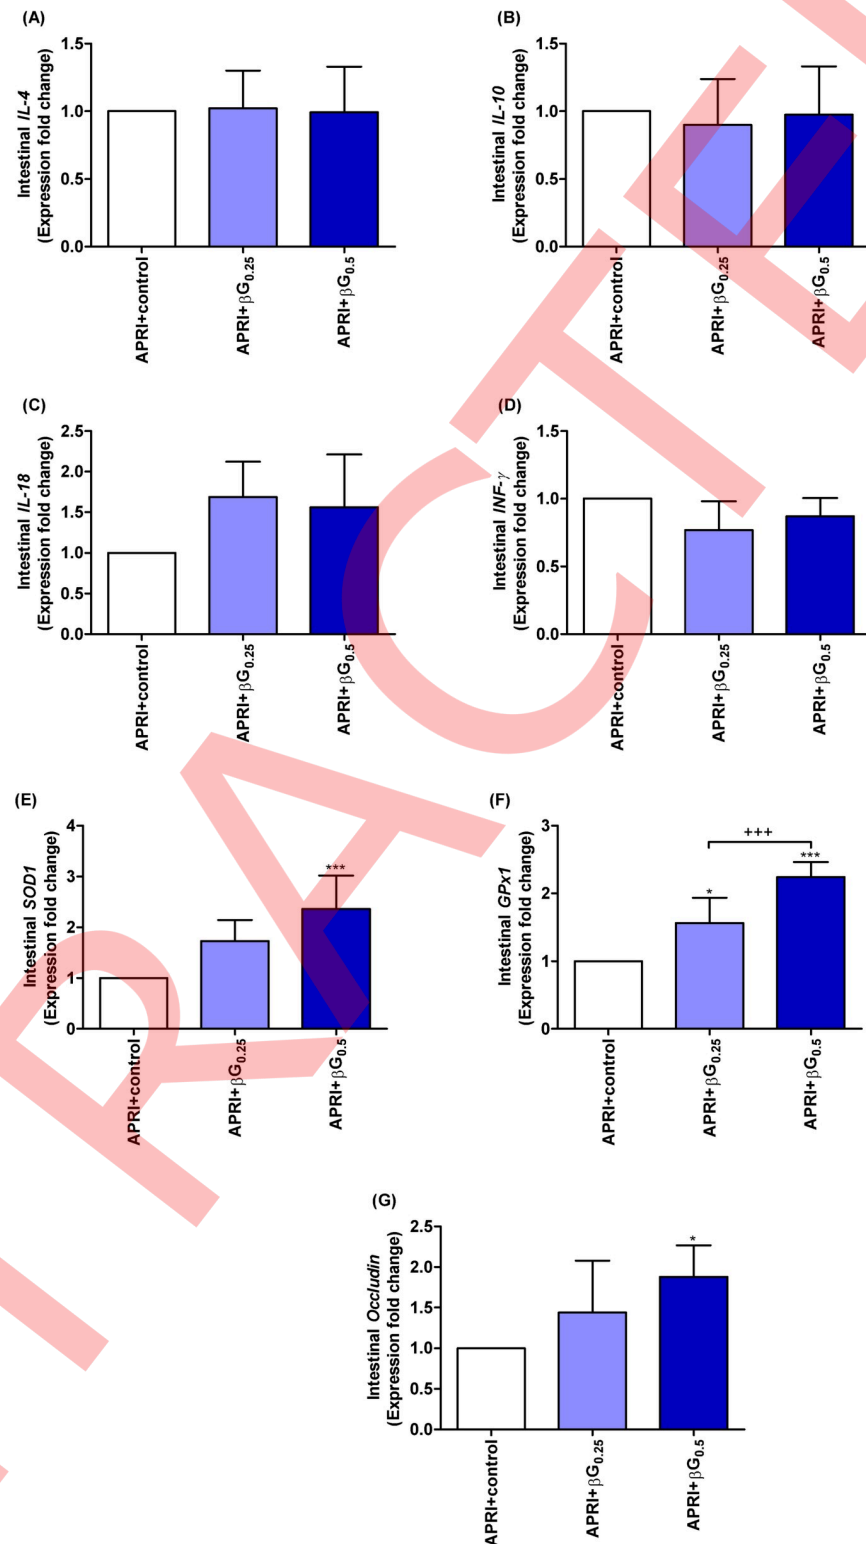

**Fig 7.** RT-PCR validation of the intestinal (A) interleukin-4 (*IL-4*), (B) interleukin-10 (*IL-10*), (C) interleukin-18 (*IL-18*), (D) interferon- $\gamma$  (*IFN- $\gamma$* ), (E) superoxide dismutase 1 (*SOD1*), (F) glutathione peroxidase 1 (*GPx1*), and (G) *occludin* genes in APRI rabbits. \* $P$  < 0.05 and \*\*\* $P$  < 0.001 vs. control. \*\*\* $P$  < 0.001 vs. APRI+ $\beta$ G<sub>0.25</sub>. Statistical analysis was performed using one-way ANOVA and Tukey's post hoc test for multiple comparisons.

<https://doi.org/10.1371/journal.pone.0234076.g007>

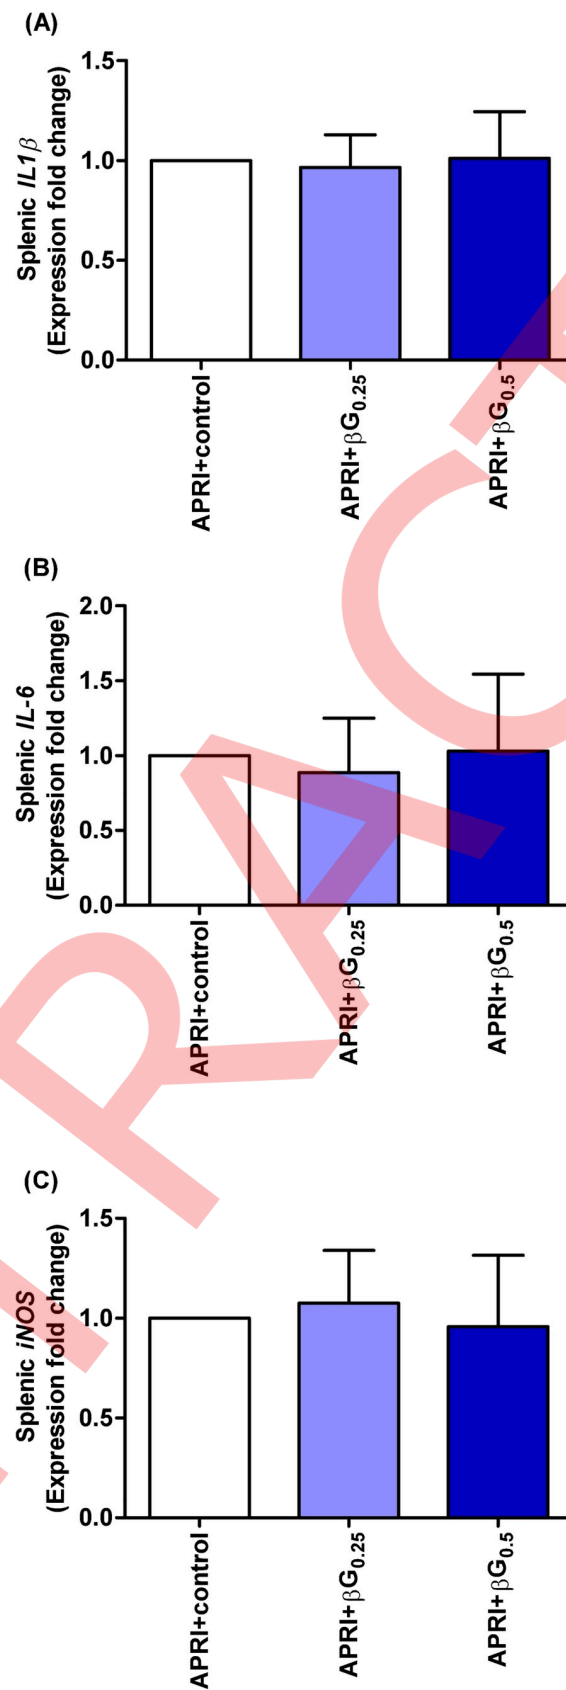

**Fig 8.** RT-PCR validation of the splenic (A) interleukin-1beta (*IL-1 $\beta$* ), (B) interleukin-6 (*IL-6*), and (C) inducible nitric oxide synthase (*iNOS*) genes in APRI rabbits. Statistical analysis was performed using one-way ANOVA and Tukey's post hoc test for multiple comparisons.

<https://doi.org/10.1371/journal.pone.0234076.g008>

[38].  $\beta$ -glucan upregulated intestinal *occludin* mRNA has anti-inflammatory and antioxidant characteristics [57].

## Conclusion

Dietary immunomodulators such as yeast  $\beta$ -glucan attract considerable attention because they promote indirect development by enhancing immunocompetence in food animals. Here,  $\beta$ -glucan significantly improved villi dimensions, splenic lymphoid diameter, muscular fiber diameter, and muscular glycogen areas. Regarding the breed type, NZW rabbits showed better growth performance than APRI rabbits as represented in the final body weight total daily gain, feed consumption, and total feed conversion ratio. However, carcass traits did not show any significant differences in both rabbit breeds. Oral administration of  $\beta$ -glucan in rabbits will minimize the use of antibiotics, thereby reducing the possible occurrence of drug resistance in bacteria.

## Supporting information

**S1 File. Raw data of RT-PCR in NZW.**  
(PZF)

**S2 File. Raw data of RT-PCR in APRI.**  
(PZF)

## Author Contributions

**Conceptualization:** Mahmoud M. Abo Ghanima, Ayman H. Abd El-Aziz, Ahmed E. Noreldin, Mustafa S. Atta, Ali H. El-Far.

**Data curation:** Mahmoud M. Abo Ghanima, Ayman H. Abd El-Aziz, Ahmed E. Noreldin, Mustafa S. Atta, Shaker A. Mousa, Ali H. El-Far.

**Formal analysis:** Mahmoud M. Abo Ghanima, Ahmed E. Noreldin, Mustafa S. Atta, Ali H. El-Far.

**Funding acquisition:** Mahmoud M. Abo Ghanima, Ayman H. Abd El-Aziz, Mustafa S. Atta, Ali H. El-Far.

**Investigation:** Mahmoud M. Abo Ghanima, Ahmed E. Noreldin, Mustafa S. Atta, Ali H. El-Far.

**Methodology:** Mahmoud M. Abo Ghanima, Ayman H. Abd El-Aziz, Ahmed E. Noreldin, Mustafa S. Atta, Ali H. El-Far.

**Project administration:** Mahmoud M. Abo Ghanima, Ayman H. Abd El-Aziz.

**Resources:** Ayman H. Abd El-Aziz, Ahmed E. Noreldin.

**Software:** Mahmoud M. Abo Ghanima, Ahmed E. Noreldin, Mustafa S. Atta, Shaker A. Mousa, Ali H. El-Far.

**Supervision:** Shaker A. Mousa, Ali H. El-Far.



**Validation:** Ayman H. Abd El-Aziz, Ahmed E. Noreldin, Mustafa S. Atta, Shaker A. Mousa, Ali H. El-Far.

**Visualization:** Mahmoud M. Abo Ghanima, Ayman H. Abd El-Aziz, Ahmed E. Noreldin, Mustafa S. Atta, Shaker A. Mousa, Ali H. El-Far.

**Writing – original draft:** Mahmoud M. Abo Ghanima, Ayman H. Abd El-Aziz, Ahmed E. Noreldin, Mustafa S. Atta, Ali H. El-Far.

**Writing – review & editing:** Mahmoud M. Abo Ghanima, Ayman H. Abd El-Aziz, Ahmed E. Noreldin, Mustafa S. Atta, Shaker A. Mousa, Ali H. El-Far.

## References

1. Attia YA, Al-Hanoun A, Bovera F. Effect of different levels of bee pollen on performance and blood profile of New Zealand White bucks and growth performance of their offspring during summer and winter months. *J Anim Physiol Anim Nutr (Berl)*. 2011; 95: 17–26. <https://doi.org/10.1111/j.1439-0396.2009.00967.x> PMID: 20455966
2. Dalle Zotte A, Szendrő Z. The role of rabbit meat as functional food. *Meat Sci*. 2011; 88: 319–331. <https://doi.org/10.1016/j.meatsci.2011.02.017> PMID: 21392894
3. Ebeid TA, Zeweil HS, Basyony MM, Dosoky WM, Badry H. Fortification of rabbit diets with vitamin E or selenium affects growth performance, lipid peroxidation, oxidative status and immune response in growing rabbits. *Livest Sci*. 2013; <https://doi.org/10.1016/j.livsci.2013.11.004>
4. Petracci M, Bianchi M, Cavani C. Development of Rabbit Meat Products Fortified With n-3 Polyunsaturated Fatty Acids. *Nutrients*. Molecular Diversity Preservation International; 2009; 1: 111–118. <https://doi.org/10.3390/nu1020111> PMID: 22253971
5. Dalle Zotte A. Perception of rabbit meat quality and major factors influencing the rabbit carcass and meat quality. *Livest Prod Sci*. Elsevier; 2002; 75: 11–32. [https://doi.org/10.1016/S0301-6226\(01\)00308-6](https://doi.org/10.1016/S0301-6226(01)00308-6)
6. Falcão-e-Cunha L., Castro-Solla L. LC, Maertens L. L, Marounek M. M, Pinheiro V. V, Freire J. J, et al. Alternatives to antibiotic growth promoters in rabbit feeding: a review. *World Rabbit Sci*. 2010; 15: 127–140. <https://doi.org/10.4995/wrs.2007.597>
7. Brown GD, Gordon S. Immune recognition of fungal  $\beta$ -glucans. *Cell Microbiol*. 2005; 7: 471–479. <https://doi.org/10.1111/j.1462-5822.2005.00505.x> PMID: 15760447
8. Vetvicka V, Dvorak B, Vetvickova J, Richter J, Krizan J, Sima P, et al. Orally administered marine (1 $\rightarrow$ 3)- $\beta$ -D-glucan Phycarine stimulates both humoral and cellular immunity. *Int J Biol Macromol*. 2007; 40: 291–298. <https://doi.org/10.1016/j.ijbiomac.2006.08.009> PMID: 16978690
9. Crespo H, Guillén H, de Pablo-Maiso L, Gómez-Arrebola C, Rodríguez G, Glaría I, et al. Lentinula edodes  $\beta$ -glucan enriched diet induces pro- and anti-inflammatory macrophages in rabbit. *Food Nutr Res*. Swedish Nutrition Foundation; 2017; 61: 1412791. <https://doi.org/10.1080/16546628.2017.1412791> PMID: 29249921
10. Chen K-L, Weng B-C, Chang M-T, Liao Y-H, Chen T-T, Chu C. Direct Enhancement of the Phagocytic and Bactericidal Capability of Abdominal Macrophage of Chicks by -1,3–1,6-Glucan. *Poult Sci*. 2008; 87: 2242–2249. <https://doi.org/10.3382/ps.2008-00147> PMID: 18931174
11. Hahn T-W, Lohakare JD, Lee SL, Moon WK, Chae BJ. Effects of supplementation of  $\beta$ -glucans on growth performance, nutrient digestibility, and immunity in weanling pigs. *J Anim Sci*. 2006; 84: 1422–1428. <https://doi.org/10.2527/2006.8461422x> PMID: 16699099
12. Krakowski L, Krzyzanowski J, Wrona Z, Siwicki AK. The effect of nonspecific immunostimulation of pregnant mares with 1,3/1,6 glucan and levamisole on the immunoglobulins levels in colostrum, selected indices of nonspecific cellular and humoral immunity in foals in neonatal and postnatal period. *Vet Immunol Immunopathol*. 1999; 68: 1–11. Available: <http://www.ncbi.nlm.nih.gov/pubmed/10231947> [https://doi.org/10.1016/s0165-2427\(99\)00006-9](https://doi.org/10.1016/s0165-2427(99)00006-9) PMID: 10231947
13. NRC. Nutrient Requirements of Rabbits. National Academy of Science, Washington, D.C; 1977.
14. De Blas C, Wiseman J. The Nutrition of the Rabbit Edited by. 2010.
15. Lambert WV, Ellis NR, Block WH, Titus HW. The role of nutrition in genetics. *Am Res Soc Anim Prod*. 1936; 29: 236.
16. Blasco A., Ouhayoun J. J. Harmonization of criteria and terminology in rabbit meat research. Revised proposal. *World Rabbit Sci*. 2010; 4: 93–99. <https://doi.org/10.4995/wrs.1996.278>

17. Bancroft J, Layton C. The Hematoxylin and eosin. In: Suvana S. K, Layton C, Bancroft J. D, editors. *Theory Practice of histological techniques.*, 7th edn. Philadelphia: Churchill Livingstone of El Sevier, Philadelphia: Churchill Livingstone of El Sevier; 2013.
18. Saeed M, Yatao X, Hassan F, Arain M, Abd El-Hack M, Noreldin A, et al. Influence of Graded Levels of L-Theanine Dietary Supplementation on Growth Performance, Carcass Traits, Meat Quality, Organs Histomorphometry, Blood Chemistry and Immune Response of Broiler Chickens. *Int J Mol Sci.* 2018; 19: 462. <https://doi.org/10.3390/ijms19020462> PMID: 29401695
19. Kiczorowska B, Al-Yasiry ARM, Samolińska W, Marek A, Pyzik E. The effect of dietary supplementation of the broiler chicken diet with *Boswellia serrata* resin on growth performance, digestibility, and gastrointestinal characteristics, morphology, and microbiota. *Livest Sci.* Elsevier; 2016; 191: 117–124. <https://doi.org/10.1016/J.LIVSCI.2016.07.019>
20. Heywood JL, McEntee GM, Stickland NC. In ovo neuromuscular stimulation alters the skeletal muscle phenotype of the chick. *J Muscle Res Cell Motil.* 2005; 26: 49–56. <https://doi.org/10.1007/s10974-005-9007-8> PMID: 16088375
21. Prats C, Gomez-Cabello A, Nordby P, Andersen JL, Helge JW, Dela F, et al. An optimized histochemical method to assess skeletal muscle glycogen and lipid stores reveals two metabolically distinct populations of type I muscle fibers. *PLoS One.* Public Library of Science; 2013; 8: e77774. <https://doi.org/10.1371/journal.pone.0077774> PMID: 24204959
22. Pfaffl MW. A new mathematical model for relative quantification in real-time RT-PCR. *Nucleic Acids Res.* 2001; 29: 45e – 45. <https://doi.org/10.1093/nar/29.9.e45> PMID: 11328886
23. Duncan DB. Multiple Range and Multiple F Tests. *Biometrics.* International Biometric Society; 1955; 11: 1. <https://doi.org/10.2307/3001478>
24. ElSawy A, ElMaddawy Z, BoGhazel H. The Growth Promoting Effect of Beta-glucan in Comparison with Sodium Butyrate in Broiler Chicks. *Alexandria J Vet Sci.* 2015; 44: 23. <https://doi.org/10.5455/ajvs.163992>
25. Attia YA, Hamed RS, Abd El-Hamid AE, Al-Harathi MA, Shahba F, Bovera HA. Performance, blood profile, carcass and meat traits and tissue morphology in growing rabbits fed mannanoligosaccharides and zinc-bacitracin continuously or intermittently. *Anim Sci Pap Reports.* Polish Scientific Publishers; 2015; 33: 85–101. Available: <http://agro.icm.edu.pl/agro/element/bwmata1.element.agro-f60df433-4194-4e39-a680-177a76aefdb5>
26. Khanna S, Gulati HK, Verma AK, Sihag SS, Sharma DP, Kapoor PK. Effect of yeast supplementation and alternative housing systems on performance of rabbits. *Haryana Vet.* College of Veterinary Sciences. Haryana Agricultural University; 2014; 53: 23–27. Available: <https://www.cabdirect.org/cabdirect/abstract/20143401914>
27. Moon SH, Lee I, Feng X, Lee HY, Kim J, Ahn DU. Effect of Dietary Beta-Glucan on the Performance of Broilers and the Quality of Broiler Breast Meat. *Asian-Australasian J Anim Sci.* Asian-Australasian Association of Animal Production Societies (AAAP); 2016; 29: 384. <https://doi.org/10.5713/AJAS.15.0141> PMID: 26950870
28. Resta-Lenert S, Barrett KE. Live probiotics protect intestinal epithelial cells from the effects of infection with enteroinvasive *Escherichia coli* (EIEC). *Gut.* 2003; 52: 988–997. <https://doi.org/10.1136/gut.52.7.988> PMID: 12801956
29. Shehata SA, Mahrose KM, Ismail EI. Effect of amino yeast addition on growth performance, digestion, carcass traits and economical efficiency of growing rabbit. *Egypt J Nutr Feed.* 2012; 15: 75–80.
30. Zhang AW, Lee BD, Lee SK, Lee KW, An GH, Song KB, et al. Effects of yeast (*Saccharomyces cerevisiae*) cell components on growth performance, meat quality, and ileal mucosa development of broiler chicks. *Poult Sci.* 2005; 84: 1015–1021. <https://doi.org/10.1093/ps/84.7.1015> PMID: 16050118
31. Ezema C, Eze DC. Determination of the effect of probiotic (*Saccharomyces cerevisiae*) on growth performance and hematological parameters of rabbits. *Comp Clin Path.* Springer-Verlag; 2012; 21: 73–76. <https://doi.org/10.1007/s00580-010-1066-6>
32. Bhatt RS, Agrawal AR, Sahoo A. Effect of probiotic supplementation on growth performance, nutrient utilization and carcass characteristics of growing Chinchilla rabbits. *J Appl Anim Res.* Taylor & Francis; 2017; 45: 304–309. <https://doi.org/10.1080/09712119.2016.1174126>
33. El-Badawi AY. Growth performance of male NZW rabbits fed diets supplemented with beneficial bacteria or live yeast. *Agric Eng Int CIGR J.* 2018; 19: 220–226.
34. Abd El-Hack ME, Samak DH, Noreldin AE, El-Naggar K, Abdo M. Probiotics and plant-derived compounds as eco-friendly agents to inhibit microbial toxins in poultry feed: a comprehensive review. *Environ Sci Pollut Res.* 2018; 25: 31971–31986. <https://doi.org/10.1007/s11356-018-3197-2> PMID: 30229484
35. Teng P-Y, Kim WK. Review: Roles of Prebiotics in Intestinal Ecosystem of Broilers. *Front Vet Sci.* Frontiers; 2018; 5: 245. <https://doi.org/10.3389/fvets.2018.00245> PMID: 30425993

36. Chen TC. Effect of adding chicory fructans in feed on broiler growth performance, serum cholesterol and intestinal length. *Int J Poult Sci*. Citeseer; 2003.
37. Tsukada C, Yokoyama H, Miyaji C, Ishimoto Y, Kawamura H, Abo T. Immunopotential of intraepithelial lymphocytes in the intestine by oral administrations of beta-glucan. *Cell Immunol*. 2003; 221: 1–5. [https://doi.org/10.1016/s0008-8749\(03\)00061-3](https://doi.org/10.1016/s0008-8749(03)00061-3) PMID: 12742376
38. Shao Y, Guo Y, Wang Z. -1,3/1,6-Glucan alleviated intestinal mucosal barrier impairment of broiler chickens challenged with *Salmonella enterica* serovar Typhimurium. *Poult Sci*. 2013; 92: 1764–1773. <https://doi.org/10.3382/ps.2013-03029> PMID: 23776263
39. Seyidoglu N, Peker S. Effects of different doses of probiotic yeast *Saccharomyces cerevisiae* on the duodenal mucosa in rabbits. *Indian J Anim Res*. 2015; 49: 602–606.
40. Tian X, Shao Y, Wang Z, Guo Y. Effects of dietary yeast  $\beta$ -glucans supplementation on growth performance, gut morphology, intestinal *Clostridium perfringens* population and immune response of broiler chickens challenged with necrotic enteritis. *Anim Feed Sci Technol*. Elsevier; 2016; 215: 144–155. <https://doi.org/10.1016/J.ANIFEEDSCI.2016.03.009>
41. Miyamoto J, Watanabe K, Taira S, Kasubuchi M, Li X, Irie J, et al. Barley  $\beta$ -glucan improves metabolic condition via short-chain fatty acids produced by gut microbial fermentation in high fat diet fed mice. Nerurkar P V., editor. *PLoS One*. 2018; 13: e0196579. <https://doi.org/10.1371/journal.pone.0196579> PMID: 29698465
42. Azevedo JL, Linderman JK, Lehman SL, Brooks GA. Training decreases muscle glycogen turnover during exercise. *Eur J Appl Physiol Occup Physiol*. 1998; <https://doi.org/10.1007/s004210050449> PMID: 9840401
43. Xu C, Lv J, Lo YM, Cui SW, Hu X, Fan M. Effects of oat  $\beta$ -glucan on endurance exercise and its anti-fatigue properties in trained rats. *Carbohydr Polym*. 2013; 92: 1159–1165. <https://doi.org/10.1016/j.carbpol.2012.10.023> PMID: 23399141
44. Belhassen T, Bonai A, Gerencsér Z, Matics Z, Tuboly T, Bergaoui R, et al. Effect of diet supplementation with live yeast *Saccharomyces cerevisiae* on growth performance, caecal ecosystem and health of growing rabbits. *World Rabbit Sci*. 2016; 24: 191. <https://doi.org/10.4995/wrs.2016.3991>
45. Hong YH, Lillehoj HS, Lee SH, Dalloul RA, Lillehoj EP. Analysis of chicken cytokine and chemokine gene expression following *Eimeria acervulina* and *Eimeria tenella* infections. *Vet Immunol Immunopathol*. 2006; 114: 209–223. <https://doi.org/10.1016/j.vetimm.2006.07.007> PMID: 16996141
46. Harrison OJ, Srinivasan N, Pott J, Schiering C, Krausgruber T, Iloft NE, et al. Epithelial-derived IL-18 regulates Th17 cell differentiation and Foxp3+ Treg cell function in the intestine. *Mucosal Immunol*. Nature Publishing Group; 2015; 8: 1226–1236. <https://doi.org/10.1038/mi.2015.13> PMID: 25736457
47. Cox CM, Sumners LH, Kim S, McElroy AP, Bedford MR, Dalloul RA. Immune responses to dietary -glucan in broiler chicks during an *Eimeria* challenge. *Poult Sci*. 2010; 89: 2597–2607. <https://doi.org/10.3382/ps.2010-00987> PMID: 21076097
48. Guo Y, Ali RA, Qureshi MA. The influence of beta-glucan on immune responses in broiler chicks. *Immunopharmacol Immunotoxicol*. 2003; 25: 461–72. Available: <http://www.ncbi.nlm.nih.gov/pubmed/19180808> <https://doi.org/10.1081/iph-120024513> PMID: 19180808
49. Li J, Xing J, Li D, Wang X, Zhao L, Lv S, et al. Effects of  $\beta$ -glucan extracted from *Saccharomyces cerevisiae* on humoral and cellular immunity in weaned piglets. *Arch Anim Nutr*. 2005; 59: 303–312. <https://doi.org/10.1080/17450390500247832> PMID: 16320779
50. Bedirli A, Kerem M, Pasaoglu H, Akyurek N, Tezcaner T, Elbeg S, et al. Beta-glucan attenuates inflammatory cytokine release and prevents acute lung injury in an experimental model of sepsis. *Shock*. 2007; 27: 397–401. <https://doi.org/10.1097/01.shk.0000245030.24235.f1> PMID: 17414422
51. Tizard IR. *Veterinary Immunology*. Elsevier Health Sciences; 2013.
52. Cox CM, Stuard LH, Kim S, McElroy AP, Bedford MR, Dalloul RA. Performance and immune responses to dietary -glucan in broiler chicks. *Poult Sci*. 2010; 89: 1924–1933. <https://doi.org/10.3382/ps.2010-00865> PMID: 20709977
53. Jaeschke H. Molecular mechanisms of hepatic ischemia-reperfusion injury and preconditioning. *Am J Physiol Liver Physiol*. 2003; 284: G15–G26. <https://doi.org/10.1152/ajpgi.00342.2002> PMID: 12488232
54. Ighodaro OM, Akinloye OA. First line defence antioxidants-superoxide dismutase (SOD), catalase (CAT) and glutathione peroxidase (GPX): Their fundamental role in the entire antioxidant defence grid. *Alexandria J Med*. No longer published by Elsevier; 2018; 54: 287–293. <https://doi.org/10.1016/J.AJME.2017.09.001>
55. Aydogan M, Polat A, Vardi N, Erdogan M, Yucel A, Yildiz A, et al. Protective effects of melatonin and and #914;-D-Glucan against acetaminophen toxicity in rats. *Med Sci | Int Med J*. 2016; 5: 539. <https://doi.org/10.5455/medscience.2016.05.8429>

56. Fanning AS, Jameson BJ, Jesaitis LA, Anderson JM. The tight junction protein ZO-1 establishes a link between the transmembrane protein occludin and the actin cytoskeleton. *J Biol Chem*. 1998; 273: 29745–29753. <https://doi.org/10.1074/jbc.273.45.29745> PMID: 9792688
57. Krizková L, Duracková Z, Sandula J, Slamenová D, Sasinková V, Sivonová M, et al. Fungal beta-(1–3)-D-glucan derivatives exhibit high antioxidative and antimutagenic activity in vitro. *Anticancer Res*. 2003; 23: 2751–6. Available: <http://www.ncbi.nlm.nih.gov/pubmed/12894570> PMID: 12894570
